# Supplementary material for: The marine methane cycle in the Canadian Arctic Archipelago during summer
Source: Copernicus journal article supplement (doi:10.5194/egusphere-2023-74), 2023-02-06

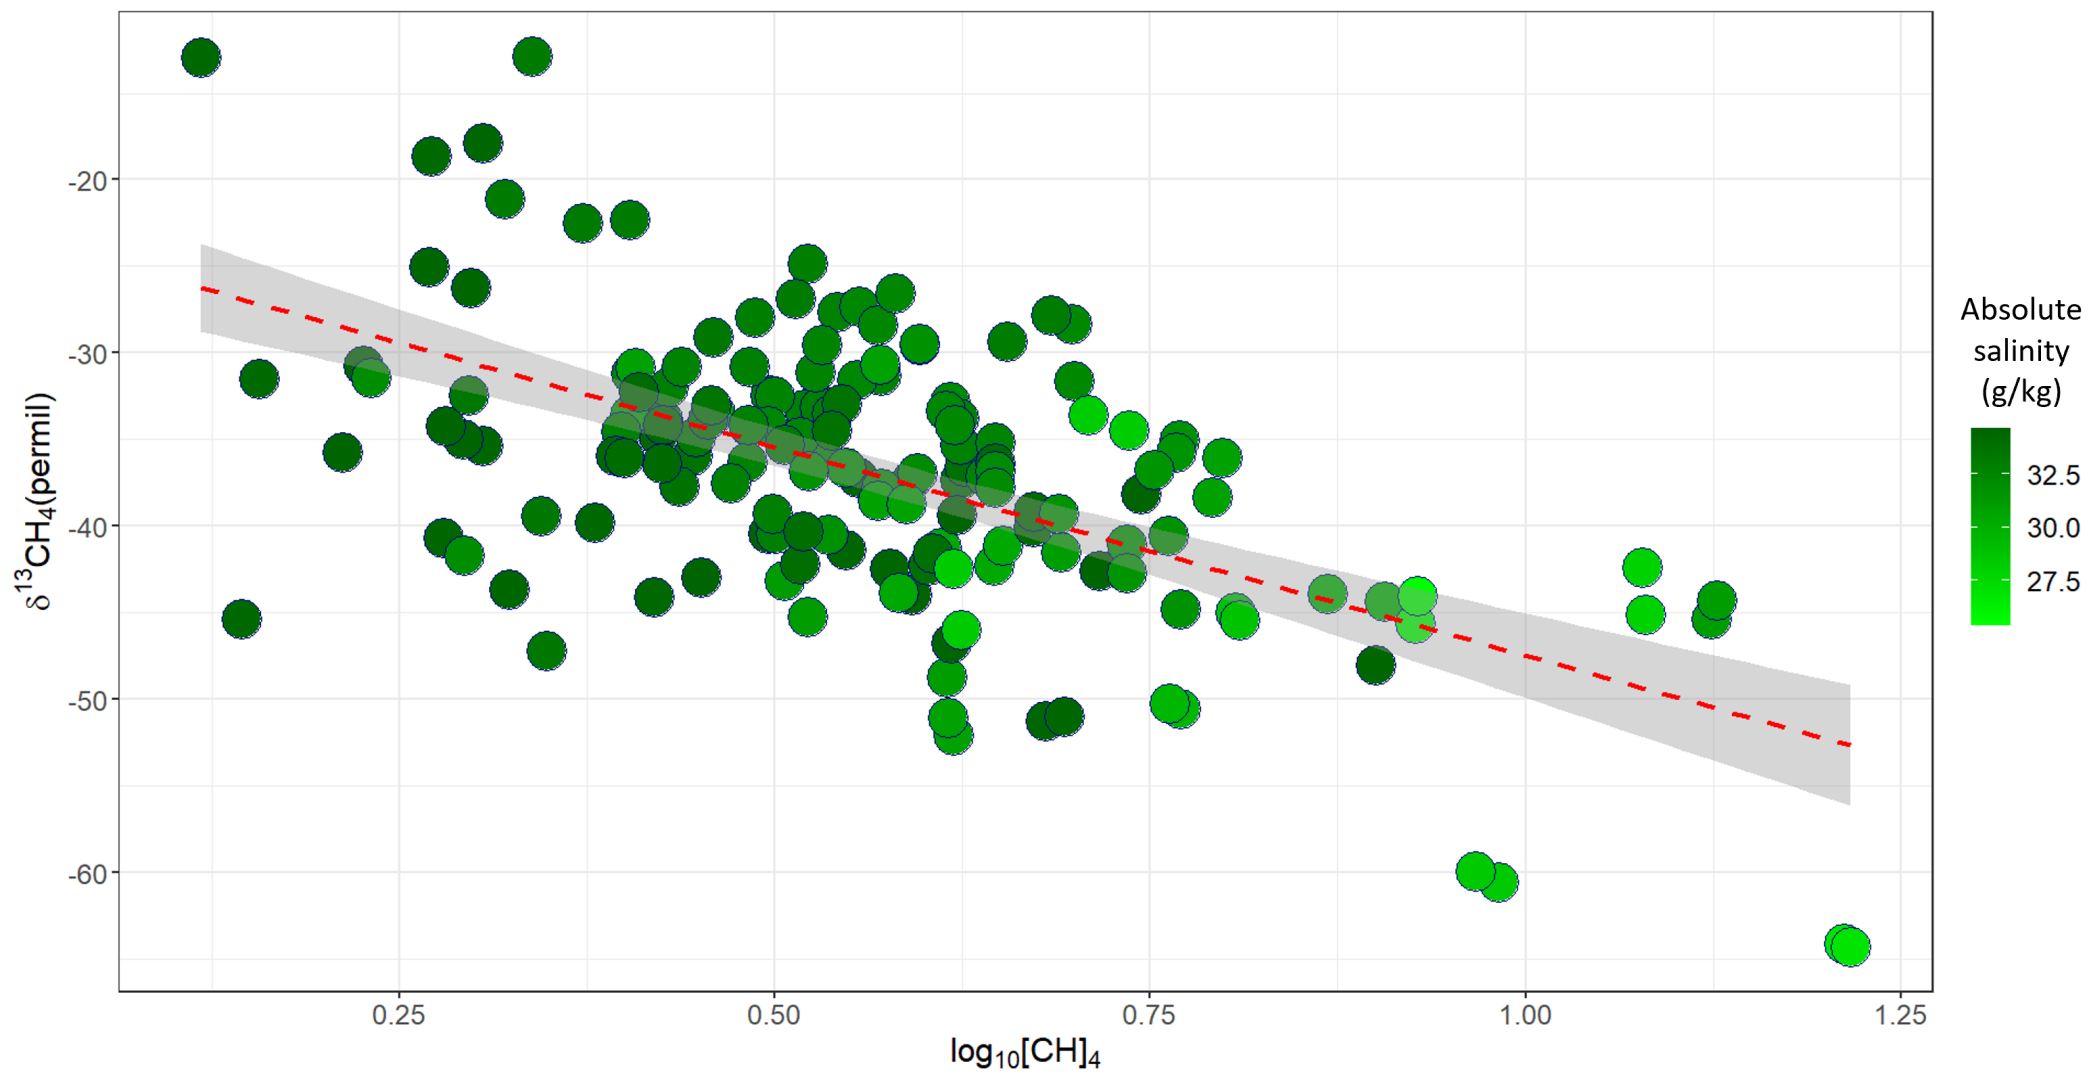

Supplement: Supplementary file [file egusphere-2023-74-AC2-supplement.pdf]
