# Supplementary material for: The marine methane cycle in the Canadian Arctic Archipelago during summer
Source: Copernicus journal article supplement (doi:10.5194/egusphere-2023-74), 2023-02-06
Supplement: Supplementary file [file egusphere-2023-74-RC2-supplement.pdf]

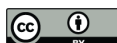

# **The marine methane cycle in the Canadian Arctic Archipelago during summer.**

Alessandra D'Angelo<sup>1</sup>, Cynthia Garcia-Eidell<sup>2</sup>, Zak Kerringan<sup>1</sup>, Jacob Strock<sup>1</sup>, Frances Crable<sup>2</sup>, Nikolas VanKeersbilck<sup>3</sup>, Humair Raziuddin<sup>2</sup>, Theresa Ewa<sup>2</sup>, Samira Umar<sup>2</sup>, Andrew L. King<sup>4</sup>, Miquel Gonzelez-Meler<sup>2</sup> and Brice Loose<sup>1</sup>

<sup>1</sup>University of Rhode Island, Graduate School of Oceanography, Narragansett, RI 02882, USA

<sup>2</sup>University of Illinois at Chicago, Chicago, IL 60607, USA

<sup>3</sup>University of Iceland, 102 Reykjavík, Iceland

<sup>4</sup>Norwegian Institute for Water Research, 0579 Oslo, Norway

Corresponding author: Alessandra D'Angelo, [a\\_dangelo@uri.edu](mailto:a_dangelo@uri.edu)

## **Abstract**

In the Arctic Ocean region, methane concentrations are higher than the global average; high concentrations of dissolved CH<sub>4</sub> are detectable especially across many subarctic and Arctic continental shelf margins. Yet the Arctic Ocean appears to emit only minimal methane fluxes to the atmosphere across the air-sea interface, suggesting water column oxidation of methane may be an important process. Here we paired thermohaline, chemical, and biological data collected during the Northwest Passage Project transit through the Canadian Arctic Archipelago (CAA) waters in the Summer of 2019, with in-situ and in-vitro methane data. Our results showed high meltwater (meteoric water + sea ice melt) throughout the Western CAA and Croker Bay in the East, and these surface meltwaters showed methane excess. The meteoric waters showed a strong correlation with chlorophyll- $\alpha$  fluorescence ( $r=0.63$ ), as well as a correlation between dissolved [CH<sub>4</sub>] and chlorophyll- $\alpha$  fluorescence ( $r=0.74$ ). Methane oxidation rate constants were highest in Wellington Channel and Croker Bay surface waters (av.  $0.01\pm0$  d<sup>-1</sup>), characterized by meltwaters and Pacific-origin waters. The average oxidation rates in meteoric and Pacific waters were respectively 24.4% and 12.6% higher than the entire survey average. Moreover, Pacific and meteoric waters hosted microbial taxa of Pacific-origin that are associated with methane oxidation, *Oleispira* ( $\gamma$ -proteobacteria), and *Aurantivirga* (Flavobacteria). The deeper layers were characterized by low methane concentrations and low methane oxidation rate constants (av.  $0.004\pm0.002$  d<sup>-1</sup>). Sea ice covered much of the Western CAA, in the same region with high sea ice meltwater concentrations. These waters also hosted higher average methane oxidation rates (av.  $0.007\pm0.002$  d<sup>-1</sup>). To the east, open coastal water coincided with methane enrichment, but low chlorophyll fluorescence and weak methane oxidation. These results suggest that methane production in ice-associated Arctic blooms may be quickly oxidized by microbes that are also found in these waters, associated with seasonal biology.

## **1. Introduction**

Methane (CH<sub>4</sub>) is a climate-relevant gas with an equivalent warming potential 28 times more potent than carbon dioxide over a 100-year timescale (Pachauri et al., 2014); after carbon dioxide, it is responsible for about 23% of climate change in the twentieth century. The major source of methane to the atmosphere is the anthropogenic emission arising primarily from agriculture, fossil fuel production, and use of waste disposal; the remaining 20% of methane emissions come from minor sources such as wildfire, biomass burning, permafrost, termites, dams, and the ocean (Saunio et al., 2020). In the Arctic region methane concentrations are 8–10% higher than the global average, with 1890 ppb, where ppb is used to abbreviate nmol mol<sup>-1</sup>, dry air mole fraction (Saunio et al., 2020; Oh et al., 2020). High concentrations of dissolved

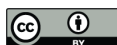

CH<sub>4</sub> in the subarctic and Arctic shelf areas were measured in recent studies (Ferré et al., 2020), however other studies showed a limited gas exchange at the air-sea interface (e.g., Fisher et al., 2011). Understanding the role of the marine microbial metabolism associated with methane production and oxidation is an important factor for assessing the methane venting into the atmosphere. In the water column, microbial methane oxidation is an important sink for dissolved CH<sub>4</sub> over some depth ranges and at some locations (e.g., Mau et al., 2013, Uhlig et al., 2018). In an aerobic environment, obligate aerobic bacteria from the phyla *Proteobacteria* and *Verrucomicrobia* have been found to oxidize methane with oxygen as an electron acceptor (Dunfield et al., 2007; Pol et al., 2007). Traditionally, the proteobacterial methane-oxidizing bacteria (MOB) were divided into three groups, type I, II, and X MOB, mainly based on (i) the arrangement of their intracytoplasmic membranes, (ii) their pathway for carbon assimilation and (iii) their major cellular fatty acids (Hanson and Hanson, 1996). Currently, with 16S rDNA and functional gene phylogeny, these divisions still hold. The type II MOB are positioned within the Alphaproteobacteria and the type I and type X MOB form two distinct clades within the Gammaproteobacteria (<http://hdl.handle.net/1854/LU-3230105>; Hoefman, 2013). Methane-derived carbon is also assimilated in nonmethane-utilizing methylotrophs (non-MOB methylotrophs) or other bacteria in freshwater and temperate marine environments (Saidi-Mehrabad et al., 2013).

Environmental drivers control the methanogenesis (microbial production of methane in hypoxic or anoxic environments) and the methanotrophy (microbial aerobic oxidation of methane), by supplying suitable substrates for the metabolic processes. For example, strengthened upwelling stimulates the formation of phytoplankton blooms (Kudela et al., 2010), enhancing the production of dimethylsulfoniopropionate (DMSP) and increasing the formation of marine particles. This could trigger CH<sub>4</sub> production (Damm et al., 2008; Florez-Leiva et al., 2013; Dang & Lovell, 2016), despite aerobic waters, as it could be utilized as a C source in the methylotrophic methanogenesis. This phenomenon may be one version of the “marine methane paradox”, which has received significant attention in recent years from the biogeochemical community, as it drives methane supersaturation in the surface waters of most of the world’s oceans with respect to atmospheric concentrations (Karl et al., 2008; Sasakawa et al., 2008; Damm et al., 2015; Repeta et al., 2016; Lenhart et al., 2016). The “marine methane paradox” has been explained with three main processes shown in recent studies: (i) marine bacteria metabolize polysaccharide-Methylphosphonate (MPn) esters through the phosphorous redox pathways in phosphate-starved environments, producing CH<sub>4</sub> as a byproduct of P acquisition (Karl et al., 2008; Repeta et al., 2016; Sosa et al., 2020); (ii) temporary anoxic microenvironments could develop associated with marine particles, such as marine snow, biofilms, zooplankton guts, etc. (Dang & Lovell, 2016; Poehlein et al., 2017); (iii) the phytoplankton metabolite DMSP could be utilized as a C source in the methylotrophic methanogenesis, where bacteria aerobically produce methane as a by-product of methylphosphonate decomposition, enhanced by the activity of nitrogen-fixing microorganisms. The process is carried out by bacteria that slowly breakdown the polysaccharides belonging to phytoplankton, breaking pairs of carbon and phosphorus atoms (called C-P bonds) from their molecular structure. The microbes create methane, ethylene, and propylene gasses as byproducts (Karl et al., 2009; Damm et al. 2009; Florez-Leiva et al. 2013). These recent research findings emphasize the importance of biota in methane production and consumption; in fact, marine microbial communities drive many of the biogeochemical processes in the world’s oceans, including the Arctic Ocean. Observations of microbial community structure can be used to identify ecosystem states, estimate biological activity rates, and better understand the mechanisms underlying changes in biogeochemical processes. Previous studies (e.g., Kitidis et al., 2010; Damm et al., 2010, Sultan et al., 2020; Manning et al., 2020, 2022) investigated the methane flux in different regions of the Arctic Ocean, inasmuch climate-



relevant gases. In the Northwest Passage (NWP), a study on the methane budget revealed methane under-saturation attributed to meltwater, and methane over-saturation underneath multi-year sea ice (Kitidis et al., 2010), which is also supported by the multi-year observations, suggesting that riverine freshwater is not a major source of CH<sub>4</sub> in the CAA, at least during summer and early fall (Manning et al., 2022). Moreover, they assessed that the calculated rate of exchange of CH<sub>4</sub> between the ocean and the atmosphere was low, suggesting that this region currently plays a minor role in regulating the global atmospheric concentrations of methane across the North American Arctic Ocean (Manning et al., 2020, 2022). Hence, the major CH<sub>4</sub> sources in the CAA remain poorly identified.

In this study, we seek to further elucidate the methane budget in the NWP, quantify seawater methane oxidation as a sink, and detect its main association with the environmental features and the biogenic control within the water column and the sea ice. These analyses are supported by thermohaline, chemical, and biological characteristics of the water masses in relation to the methane cycle. The uniqueness of this study is the provision of paired datasets of the methane budget with associated marine microbial community, macronutrient data, and physical properties of the water masses in the CAA. In the next section, we will describe the oceanography of the Canadian Arctic Archipelago, in order to understand its hydrographic regime. In section 2, we will describe the methods developed for processing and analyzing the samples. In section 3, we will show the results achieved, and we will exhibit the dissolved methane data coupled with the in-vitro experiments for the oxidation potential. We will observe this data encompassed with the microbial taxonomy occurring in the samples, and finally, in section 4, we will discuss the outcome highlighting the major sources and sinks of methane gas, and the potential hot spots of methane oxidations within the study area. The result will provide the methane biogeography within the CAA.

## 1.2 Study area

The study area was centered around Parry Channel, between 71 – 77 °N, and 100 – 79 °W (Fig. 1). From East to West, named parts of the Channel are, Lancaster Sound, Barrow Strait, and Viscount Melville Sound. This Channel connects Baffin Bay with the Beaufort Sea on their eastern and western sides, respectively.

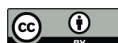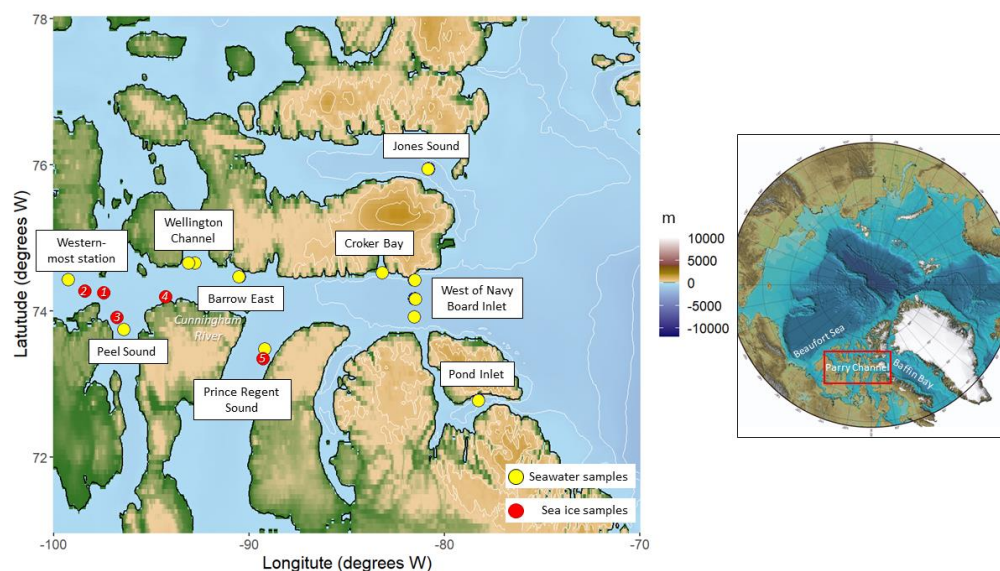

Figure 1: On the left, study area with sampling stations during the Northwest Passage cruise, July – August 2019. The yellow dots represent the water column sampling locations, whereas the red ones represent the sea ice coring sites. On the right, international bathymetric chart of the Arctic Ocean (IBCAO, Jakobsson et al., 2008), with the study area highlighted by the red rectangle.

The Arctic Ocean (AO) is characterized by a large estuarine system wherein the inputs and disposition of freshwater components provide thermohaline (buoyancy) forcing (Stigebrandt, 1984; Carmack et al., 2016). The CAA acts as a watershed discharge in the AO, as it is characterized by advection from the relatively fresh upper layers of the AO, ice melt, local river discharge, and net precipitation (Ingram and Larouche, 1987). The Northwest Passage is one of three main routes connecting the AO to the Labrador Sea and the North Atlantic (McLaughlin et al., 2007). There is a limiting sill within the Lancaster Sound located further east in Barrow Strait, where the depth is ~125 m. Continuing eastward water depths again increase gradually to ~500m in Lancaster Sound, then increase rapidly to over 2000 m in the center of Baffin Bay (McLaughlin et al., 2007). Flow through the CAA, from the Pacific to the Arctic to the Atlantic Oceans, is due to the higher sea level of the Pacific Ocean (McLaughlin et al., 2007). This sea level difference occurs because Pacific waters (PW) are fresher and, assuming a level of no-motion among the three ocean basins, the Arctic is thought to be 0.15 m higher than the Atlantic (Stigebrandt, 1984). During the eastward transit through Parry Channel, the PW, and Atlantic Water (AW) undergoes mixing. The shallow sill at Barrow Strait restricts the flow eastward across Lancaster Sound, constraining the deep layer of AW (McLaughlin et al., 2007). Here, the riverine runoff supplied by Cunningham River, Garnier River, and Mecham River has a big effect on the hydrodynamics and biogeochemistry of Lancaster Sound (Brown et al., 2020). The Special Report on the Ocean and Cryosphere in a Changing Climate published by the IPCC in 2021, showed how the runoff into the AO increased for Eurasian and North American rivers by  $3.3 \pm 1.6\%$  and  $2.0 \pm 1.8\%$  respectively (1976–2017). Another force affecting the hydrodynamics within Parry Channel is tidal energy. It enters the CAA primarily from the Atlantic Ocean and is mainly semi-diurnal. As a result, waters transiting the NWP are significantly modified by tidally-driven mixing and, in the vicinity of Barrow Strait, tidal



currents are especially strong, reaching 50–150 cm s<sup>-1</sup> (Prinsenbergh and Bennet, 1989). The water column structure is characterized by AW in the deep layers, with Pacific-origin waters overlaid, and seasonal mixed water at the top (McLaughlin et al., 2007). In the summer, the seasonal mixed layer contains fresh water from river outflow and sea-ice melt and is characterized by low salinities (24<S<31), warm temperatures, low nutrient concentrations, and high dissolved oxygen saturations. This water is the upper-most layer and its depth changes accordingly to the meltwater supply (~ 50 m in depth in **Parry Channel**). Below this layer is the Pacific-origin summer water. This water is characterized by relatively warm temperatures and higher salinities (31<S<32), with higher nutrient concentrations and decreasing oxygen saturations. Atlantic-origin water, within deep layers, shows maximum nutrient concentrations (McLaughlin et al., 2007). The western part of the CAA is characterized by a more consistent sea-ice coverage (Agnew and Howell, 2003). The information released by the Canadian Ice Service shows that the ranges of sea ice thickness of first-year ice in the CAA can vary from maximum values of 2.5 m in the northern and 2.0 m in the southern sections. Multi-year ice can reach a thickness of 3–5 m (Canadian Ice Service, 2002). Between freeze-up in January and break-up in late July the ice is generally immobilized as landfast ice and due to strong winds, it is also characterized by the occurrence of polynyas (Dunbar, 1969).

## 2. Materials and methods

The list of the sampling locations and acronyms used in this paper is the following (Fig. 1): Western-most station (WS), Wellington Channel (WC), Peel Sound (PS), Prince Regent Sound (PRS), West of Navy Board Inlet (WNBI), Crocker Bay (CB), Jones Sound (JS), Pond Inlet (PI).

### 2.1 Sampling procedures

Seawater and sea ice samples were collected in the vicinity of Parry Channel during the Northwest Passage Project cruise held between 17 July – 4 August 2019 onboard the Swedish icebreaker RVIB Oden. The stations include both single points and transects (see Fig. 1), covering the area with longitude 78°14.94' W - 99°16.63' W. Seawater were collected using a SeaBird 32 Water Carousel CTD rosette (24 x 12L), set with a SeaBird SBE 911+ CTD with dissolved oxygen and WETLabs Ecopuck sensors. The CTD sensor was owned and calibrated by the Swedish Polar Research Secretariat (SPRS). CTD casts and rosette bottle data are hosted at Swedish National Data Service (<https://snd.gu.se/en/catalogue/study/2021-119#dataset>), whereas the whole dataset and the processed CTD data are stored in Arcticdata.io (<https://doi.org/10.18739/A2BN9X45M>). Sea ice cores were sampled with a Kovacs ice corer drill. The sea ice concentration data was provided by the University of Bremen data archive, with 10m space resolution ([seaice.uni-bremen.de](http://seaice.uni-bremen.de), Spreen et al., 2008). Sea ice charts were collected by the Canada ice center ([www.canada.ca/en/environment-climate-change/services/ice-forecasts-observations/publications/interpreting-charts](http://www.canada.ca/en/environment-climate-change/services/ice-forecasts-observations/publications/interpreting-charts)).

*Nutrients* – A total of 239 seawater samples were collected for nutrients measurements (for processed data see: <https://doi.org/10.18739/A2BN9X45M>). A volume of ~ 45ml sample was filtered through 0.22-micron Millex-GP Sterile Syringe Filters with PES Membrane (Thermo Fischer Scientific) into a Corning Falcon 50 mL Conical Centrifuge Tubes (Fisher Scientific). The samples were stored onboard RVIB Oden at -20°C for post-expedition analysis.

*Methane* – A total of 132 (56 experimental and 76 discrete) seawater samples (Table S1) and 5 sea ice cores (Table S2) were collected and analyzed for methane concentration and isotope ratio as well as the microbial oxidation rate. The samples were both collected through multi-layer foil gas sampling bags (Restek, Bellfonte) and processed for further analysis (see details in paragraph 2.3).





**Microbial community** – A total of 18 seawater samples were collected from the in-vitro methane incubations at the end of the experiments, for identifying the most abundant taxa. A cylindrical, 0.22  $\mu\text{m}$  Sterivex membrane filter (Millipore Sigma, Billerica, MA) was connected to the valve of each bag for the samples collection. We removed and sealed the filters and stored them in  $-80^\circ\text{C}$  freezers until they were transported to the University of Rhode Island (URI), Graduate School of Oceanography (GSO) for post-expedition DNA extraction, using the DNeasy PowerWater Sterivex Kit (Qiagen, Germantown, MD) following the manufacturer’s protocol (see details in paragraph 2.4).

## 2.2 Nutrients

Silicate, phosphate, nitrate, and nitrite concentrations were determined using a Quik Chem Series 8500 Lachat analyzer (Serial Number 061100000379 – Hach, Loveland, Colorado, USA). Heater Configuration 500 W Max, reagents and standards prepared using Quik Chem Protocols: Nitrate + Nitrite 31-107-04-1 A, Silicate 31-114-27-1 A, Phosphate 31-115-01-1 H. The analysis was carried out at the Marine Science Research Facility, URI - GSO (<https://web.uri.edu/marinefacility/>). To quality check the nutrients data, after excluding the data showing  $\text{SD} > 5\%$  between the replicated measurements, we compared nutrient data with datasets from literature (e.g., Torres-Valdés et al., 2013; Bhatia et al., 2021) and databases (e.g., DiTullio and Lee, 2019). When all the three measured nutrients (phosphate, nitrate+nitrite, silicate) showed nonagreement with the reference data, a flag = 0 was assigned to the values, highlighting outliers (D’Angelo et al., 2022 *preprint*). In total, 5 outliers were highlighted in our data frame. We also tried to identify the outliers through other procedures, but these did not show high efficacy for our dataset. In this case, calculating N:P:Si ratios for near Redfield-like consistency is likely not appropriate for our data, since denitrification plays a big part in shaping the nutrient ratios in Pacific waters, and significant freshwater inputs influence nutrients in a non-Redfield manner (Macias et al., 2019).

## 2.3 Methane concentration and isotope ratio measurements for discrete and experimental samples

**Samples processing** – Seawater for gas and isotope analysis was collected through vacuum multi-layer foil gas sampling bags equipped with a polypropylene combo valve and septum (capacity 1L and 3L, # 22950 and # 22951, Restek, Bellfonte, Pennsylvania, U.S.A.). Discrete samples were put in 3L size bags, while the experimental samples were collected in 1L size bags. Experiments were performed with approximately 0.8/0.9 L seawater, while discrete samples volumes were  $\sim 2.8$  L. The sea ice cores were put in 3L bags and melted at room temperature for the analysis. For each sample, a headspace with hydrocarbon-free air (Airgas, Rhode Island) was made to permit multiple measurements from the same sample in a time series. For incubation samples we injected a known volume (1 to 2.5 ml, see Table 1) of gas standards with known concentration and isotopic composition (std. 1003: 2500ppmv,  $\delta^{13}\text{CH}_4 = -66.5$  ‰ Isometrics, Victoria, British Columbia, Canada). For the calibration of the instrument, we used additional methane standards.

Table 1: Information on incubation experiments. In the table are shown only the data without discrepancy between the methane oxidation rate constants of mass balance and isotope ratio.

| Sample | CTD | Transect                        | Date      | Depth (m) | CH <sub>4</sub> spike (ml) |
|--------|-----|---------------------------------|-----------|-----------|----------------------------|
| 22     | 3   | Jones Sound (JS)                | 7/19/2019 | 609       | 1                          |
| 26     | 3   | Jones Sound (JS)                | 7/19/2019 | 7         | 1                          |
| 36     | 8   | West of Navy Board Inlet (WNBI) | 7/23/2019 | 70        | 2.5                        |

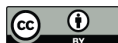

|    |    |                                 |           |     |     |
|----|----|---------------------------------|-----------|-----|-----|
| 37 | 8  | West of Navy Board Inlet (WNBI) | 7/23/2019 | 15  | 2.5 |
| 39 | 8  | West of Navy Board Inlet (WNBI) | 7/23/2019 | 15  | 2.5 |
| 40 | 8  | West of Navy Board Inlet (WNBI) | 7/23/2019 | 450 | 2.5 |
| 41 | 8  | West of Navy Board Inlet (WNBI) | 7/23/2019 | 70  | 2.5 |
| 43 | 12 | West of Navy Board Inlet (WNBI) | 7/24/2019 | 743 | 2.5 |
| 45 | 12 | West of Navy Board Inlet (WNBI) | 7/24/2019 | 401 | 2.5 |
| 58 | 21 | Wellington Channel (WC)         | 7/26/2019 | 10  | 2.5 |
| 59 | 21 | Wellington Channel (WC)         | 7/26/2019 | 10  | 2.5 |
| 76 | 41 | Prince Regent Sound (PRS)       | 7/31/2019 | 25  | 2.5 |
| 78 | 41 | Prince Regent Sound (PRS)       | 7/31/2019 | 25  | 2.5 |
| 79 | 52 | Croker Bay (CB)                 | 8/3/2019  | 7   | 2.5 |
| 81 | 52 | Croker Bay (CB)                 | 8/3/2019  | 241 | 2.5 |
| 82 | 52 | Croker Bay (CB)                 | 8/3/2019  | 241 | 2.5 |
| 83 | 52 | Croker Bay (CB)                 | 8/3/2019  | 7   | 2.5 |

228

229 The bags for in-situ measurements were stored in water at room temperature (~10°C), while the  
 230 experimental bags were stored in a cold room onboard Oden at ~0°C. Bags were analyzed for [CH<sub>4</sub>] and  
 231 isotopic signature (δ<sup>13</sup>CH<sub>4</sub>) directly after preparation, following the method of Uhlig et al. (2017).

232 *Analytic procedure* – Analysis for [CH<sub>4</sub>] and δ<sup>13</sup>CH<sub>4</sub> was performed with a Picarro G2201-i cavity  
 233 ring-down spectrometer (Picarro, Santa Clara, California, U.S.A.) coupled to Small Sample Introduction  
 234 Module (SSIM) (Picarro, Santa Clara, California, U.S.A.) (Uhlig and Loose, 2017). The SSIM is a sample  
 235 inlet system useful for the determination of isotope ratios from discrete samples with a flow rate of  
 236 approximately 22 mL min<sup>-1</sup>. The SSIM further offers the possibility to dilute highly concentrated samples  
 237 with hydrocarbon free zero air to reach the specification range of the analyzer of 1.8–500 ppm CH<sub>4</sub> (Uhlig  
 238 and Loose, 2017). The dilution factor was calculated from the volume of sample (V<sub>sample</sub>), volume of the  
 239 dilution chamber (V<sub>SSIM</sub>=22 mL), the pressure of the dilution gas (P<sub>SSIM</sub>), and the atmospheric pressure  
 240 (P<sub>atm</sub>) recorded onboard:

241 
$$dil\ factor\ SSIM = \frac{P_{ssim}}{\frac{V_{sample}}{V_{ssim}} * P_{atm}}$$

242 To avoid water vapor, samples introduced into the SSIM passed first through a Nafion V R tube in a  
 243 Permapure Gas Dryer cartridge filled with desiccant (#DM-060-24-COMP2, Permapure LLC, New Jersey,  
 244 U.S.A.). Sample and standard volumes injected into the SSIM using SGE gastight syringes equipped with  
 245 shutoff valves (1 mL, 5 mL and 10mL total volume - SGE, Victoria, Australia) varied between 0.01 mL  
 246 and 10 mL, respectively. The SSIM coordinator software was run on fast measurement mode, syringe  
 247 injection setting, and dilution with hydrocarbon-free air (Uhlig et al., 2017). The saturation capacity of the  
 248 in-situ samples was calculated with the Gas-Solubility Codes in R (<https://github.com/URIGSO/Gas-Solubility-Codes>) and using in-situ potential temperature and practical salinity. For the sea ice, we used a  
 249 salinity of 2 from the sea ice cores averaged data.

251 *Calibration* - To obtain more reproducible data, the manufacturer recommends the use of the  
 252 G2201-i for methane mixing ratios >1.8 ppm (see Uhlig et al., 2017, Fig.1a). Standard gases 1001  
 253 (2500ppmv, δ<sup>13</sup>CH<sub>4</sub>= -23.9 ‰), 1002 (250ppmv, δ<sup>13</sup>CH<sub>4</sub>= -38.3 ‰), 1003 (2500ppmv, δ<sup>13</sup>CH<sub>4</sub>= -66.5 ‰)  
 254 were used to generate linear calibrations for mixing ratios and isotope ratios in order to correct for any



transient deviations in the G2201-i analyzer, while the standard 1003 was used almost simultaneously during the measurements to calibrate the measurements via daily drift.

*Estimating the oxidation rates from mass balance and isotopic fractionation* – Microbial methane oxidation was determined from the methane mass balance in incubation experiments following the method of Uhlig and Loose (2017). Briefly, an aliquot of methane standard with known concentration and isotope ratio ( $pCH_4 = 2500$  ppmv, and  $\delta^{13}CH_4 = -66.5$  ‰) was added to every incubation to monitor the change in moles and the isotope ratio. The time of the incubations varied between 7 and 25 days, and the samples were stored in a cold bath between 0 and 1°C.

For each methane incubation, we develop two independent measurements of the oxidation rate using the (1) molar mass balance and (2) isotopic fractionation during oxidation/production (Uhlig and Loose, 2017). During the methane microbial oxidation, the  $[CH_4]$  decreases overtime, due to the consumption made by microbes, while the isotopic signature increase as a sign of preference towards  $\delta^{12}CH_4$  of microbes. The reservoir of methane ( $M_{tot}$ ) here represented the sum of the mass of methane dissolved in the water ( $M_{gw}$ ) and the mass of methane in the headspace ( $M_{ghs}$ ) in moles.

$$M_{tot} = M_{gw} + M_{ghs}$$

As the measurements were repeated on the same sample at each time, it was important to account for the decrease in the headspace volume which affects the numbers of moles of methane that can transfer to the water for oxidation. Before calculating the oxidation rate, the total mass of  $CH_4$  was corrected for the mass removed during sampling to obtain as in appendix A, Uhlig et al. (2017). It is routine to assume that microbial methane oxidation can be modeled as a first order kinetic process during the exponential oxidation phase (Reeburgh et al., 1991; Valentine, 2002).

$$\ln \left( \frac{M_{tot\_corrected_{t_i}}}{M_{tot\_corrected_{t_{i-1}}}} \right) = k_{ox} * t_{i-i-1}$$

Where  $M_{tot\_corrected_{t_i}}$  was calculated as:

$$M_{tot\_corrected_{t_i}} = M_{tot_{t_i}} + \sum_{i=0}^{j=t_i-1} M_{sampled}$$

Therefore, the oxidation rate constant  $k_{ox}$  (with units of  $time^{-1}$ ) was determined as the negative slope of the linear regression of  $\ln(M_{tot\_corrected})$  and the incubation time ( $t_i$ ). Conventionally, a positive  $k_{ox}$  indicates a decrease in methane concentration, while a negative  $k_{ox}$  indicates an increase. Molar quantities of methane in the headspace ( $M_{ghs}$ ) and water ( $M_{gw}$ ) were calculated as equilibrium concentrations according to Magen et al. (2014) with the equilibrium constant according to Yamamoto et al. (1976). In addition to the decrease in the total mass of  $CH_4$  caused by microbial oxidation of  $CH_4$ , the carbon isotope ratio of the remaining methane pool changes due to isotopic fractionation (Whiticar, 1999). The fractionation factor  $\alpha_{ox} = k_{12}/k_{13}$  (Mahieu et al., 2006) is the ratio of the kinetic constants for reactions of the heavier ( $k_{13}$ ) and

lighter ( $k_{12}$ ) isotope  $CH_4$  (Uhlig et al., 2017 - Appendix B). By plotting  $\ln \left( \frac{1000 + \delta^{13}CH_4_{t_i}}{1000 + \delta^{13}CH_4_{t_0}} \right) \frac{1}{(\alpha_{ox} - 1)}$  vs.  $t$ , the first

order oxidation rate constant derived from  $\delta^{13}CH_4$  ( $k_{ox,\delta}$ ) was determined as the negative slope of the linear regression. A positive  $k_{ox,\delta}$  indicates an increase in  $\delta^{13}CH_4$ , and a negative  $k_{ox,\delta}$  a decrease. Cold marine environments with temperatures below 28°C record fractionation factors in the range of 1.002–1.017 (Cowen et al., 2002; Grant & Whiticar, 2002; Damm et al. 2007; Fenwick et al., 2017), but for *in-situ* data it must be taken in account the mixing effects in the water column (Grant & Whiticar, 2002). As in Uhlig





eth al. (2017), this study used  $\alpha_{ox}$  of 1.007 as lower bounds. The microbial oxidation rates were calculated from the first order rate constant  $k_{ox}$  and the methane concentration dissolved in the water  $[CH_4]_w$  during the incubation experiments as  $r_{ox} = k_{ox} * [CH_4]_w$  (Uhlir et al., 2017). To validate the reproducibility of the data, we plotted the comparison of first order rate constants determined from concentration ( $k_{ox, mass, balance}$ ) and isotope ratio ( $k_{ox, isotope, ratio}$ ) (Fig. 2). The trend line in Figure 2 showed linear correlation of 0.52 by the Spearman's rank.

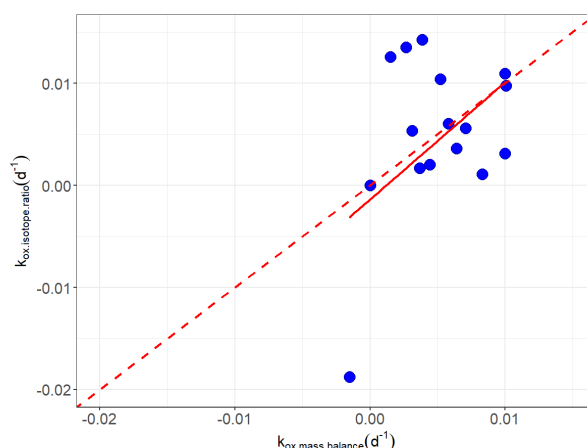

300

Figure 2: Comparison between first order oxidation rate constants ( $k_{ox}$ ) determined from  $CH_4$  concentration (mass balance) and isotope ratios. The red line displayed the linear model between the values (R-squared: 0.2564 p-value: 7.985e-12), whereas the red dashed line represented the 1:1 regression line.

304

To assess the success of the experiments and measure the microbial activity, a killed control was prepared for each sample by adding 0.1M NaOH and injecting it into the sample after the  $t_{final}$  measurement. For 1L sample, we diluted 4 g NaOH pellets in 100ml MilliQ and injected 10ml solution into the sample. The  $[CH_4]$  and  $\delta^{13}C-CH_4$  were measured three times within one week time frame.

*Quality control* - The measurements of methane concentration were not calibrated, because the standard deviation between replicate dissolved methane water samples was significantly smaller than the standard deviation in gas standards that were introduced to the Picarro analyzer, likely due to a manual artifact during syringe sampling of the gas standards. A complete calibration of  $\delta^{13}CH_4$  isotope ratio was carried, because the isotope ratio was not affected in the same way as concentration during syringe sample. Linear calibration equations were determined using three standards 1003: 2500ppmv,  $\delta^{13}CH_4 = -66.5\text{‰}$ ; 1002: 250ppmv,  $\delta^{13}CH_4 = -38.3\text{‰}$ ; 1001: 2500ppmv,  $\delta^{13}CH_4 = -23.9\text{‰}$ ; the standard 1003 was used for calculating the daily drift of the instrument. The 1003 standard revealed distinct instrumental drift while onboard the vessel Oden, as compared to the measurements on land; hence, we evaluated the dataset in two periods, from July 19<sup>th</sup> to August 4<sup>th</sup> (when the data were measured at sea), and from August 5<sup>th</sup> to August 14<sup>th</sup> (when the data were measured in the National Science Foundation facilities at Thule airbase, Greenland). For the isotope ratio, we calculated the slope and intercept of the standard 1003 overtime and used the slope and intercept from the days of full calibrations (July 19 and July 29) into the equation for the data correction.

322



323  $data.corrected = slope.day.cal * (data - std.1003.overtime) + (-66.5)$

324 Where, -66.5 ‰ was the expected isotope ratio of the standard 1003.

325 *Statistical criteria used to determine the oxidation rate:* Duplicate in-vitro bag samples were collected  
 326 for every in-vitro determination of methane concentration. This gives a matrix of 2 bags x 2 independent  
 327 measurements (mass balance and isotopic fractionation) to make a robust determination of methane  
 328 oxidation. The criteria that were used for this determination were as follows:

- 329 1. For each in-vitro bag, the slope in molar mass and isotope ratio, described above was subjected to  
 330 a significance test using the Student's T distribution, to ensure that the slope or the rate of change  
 331 in  $[CH_4]$  or  $\delta^{13}CH_4$  vs. time (oxidation or production rate) was unique from zero, within error. The  
 332 number of independent measurements for each incubation was less than 15 ( $N < 15$ ), and we chose  
 333 a confidence interval of 0.95.
- 334 2. Next, we compared the isotope ratio and molar mass determination between both bags, for quality  
 335 check. First, we picked the bags showing agreement between the isotope ratio and the molar mass  
 336 oxidation constants ( $k_{ox.mass.balance}$  and  $k_{ox.isotope.ratio}$  showing same sign). The samples showing  
 337 discrepancy within the  $k_{ox.mass.balance}$  and  $k_{ox.isotope.ratio}$  were flagged with "0" in the final dataset ( $N =$   
 338 37 over  $N_{tot} = 56$ ) and they were not considered in this manuscript.
- 339 3. Once selected the sub-dataset, we removed data showing discrepancies within the null hypothesis  
 340 (for example, for the same sample we had  $k_{ox.mass.balance}$  accepting and  $k_{ox.isotope.ratio}$  rejecting the null  
 341 hypothesis). In some cases, the whole matrix 2x2 did not show the same outcome, and we selected  
 342 only data showing at least 3 agreements over 4 (2 x mass balance and 1 x isotope ratio, or vice  
 343 versa).
- 344 4. The full analyses were performed with the software package R version 4.1.2 in RStudio Version  
 345 1.2.5033. Plots were prepared with base and ggplot2 packages.

346 Using these criteria, we can determine a definitive rate of methane oxidation vs. no measurable rate of  
 347 methane oxidation. We consider a rate of 'no detectable oxidation' to also be a scientifically useful outcome  
 348 because it provides a census and biogeography for where and how frequently microbial oxidation is taking  
 349 place. A third outcome of the incubations can be methane production. Our experiments are not well set up  
 350 to measure this as we add methane of a known isotope ratio, which might overwhelm methane produced  
 351 by microbes. Nevertheless, some samples revealed methane production although all did not pass the  
 352 statistical criteria described above.

353

## 354 **2.4 DNA extraction and sequencing**

355 Methane-oxidizing communities from seawater were analyzed for their entire community diversity (16S  
 356 rRNA gene sequencing) from methane incubated samples at time 'Final' of the experiment (Uhlir et al.,  
 357 2018). DNA was extracted with the PowerWater® DNA extraction kit (MoBio, Carlsbad, California, USA).  
 358 The DNeasy PowerWater Sterivex Kit was used to isolate genomic DNA from Sterivex filter units  
 359 (Millipore® cat. no. SVGPL10RC) without the need for enzymes or hazardous organic chemicals. Inhibitor  
 360 Removal Technology® (IRT) was included to provide high-quality DNA from all types of water samples,  
 361 even those containing heavy amounts of contaminants. In addition, MB Spin Columns and tube extenders  
 362 allowed for one-step addition of the entire sample lysate (4.5 ml) and elution in a 50–100 µl volume. The  
 363 DNeasy PowerWater Sterivex Kit protocol started with the addition and incubation of the Sterivex units  
 364 with a novel filter membrane treatment. Lysis buffer was added to the units, which were then mixed. The  
 365 lysate was then removed for additional mechanical lysis in a 5 ml bead beating tube. After the protein and  
 366 inhibitor removal steps, extracted genetic material was captured on an MB Spin Column under vacuum.



The column was washed, and high-quality DNA was eluted from the MB Spin Column filter membrane for use in downstream applications, including PCR and qPCR.

*PCR amplicon construction and sequencing* - From each extract, the V4-V5 hypervariable region of the 16S rRNA gene were amplified using forward and reverse primers from Parada et al., 2016. A 20- $\mu$ l PCR reaction was performed for each sample which contained a mixture of 0.4  $\mu$ l Platinum SuperFi II DNA Polymerase (Invitrogen, Carlsbad, CA), 4  $\mu$ l SuperFi II Buffer (5x), 0.2 mM dNTPs, 0.5  $\mu$ M of each primer, and 0.1  $\mu$ l Bovine Serum Albumin (Thermo Scientific, Carlsbad, CA). We amplified each water sample in a single PCR reaction with 5  $\mu$ l of DNA template. To account for possible PCR reagent contamination during PCR amplification, three samples were amplified (one for each batch of polymerase used), each one containing only laboratory water and no extract. Additionally, we completed the full DNeasy PowerWater Sterivex protocol using a sterile Sterivex filter for each kit to account for possible kit contamination. The thermal cycler program for all reactions began with an initial denaturation temperature of 98°C for 30 seconds followed by 35 cycles of 98°C for 10 seconds, 60°C for 10 seconds, and 72°C for 15 seconds, followed by a final extension of 72°C for 5 minutes. We cleaned all the samples using the Agencourt AMPure PCR Purification Kit (Beckman Coulter Life Sciences, Indianapolis, IN). Finally, all samples were sent to the University of Rhode Island Genomics and Sequencing Center and sequenced on an Illumina MiSeq platform using the Illumina MiSeq V3 chemistry at 2 x 300 cycles (NCBI BioProject PRJNA718862).

## 2.5 Water mass detection

Water masses were defined by a linear mixing model, the multiparameter analysis (Tomczak, 1981). The contribution of each Source Water Masses (SWM,  $f_i$ ) was estimated for each measured point using an ordinary least squares method. The obtained  $f_i$  values are in the range 0–1 and refer to the amount of a certain SWM “ $i$ ” that is implicated in the mixing processes (Pardo et al., 2012; Newton et al., 2013). The SWMs in our study were: Atlantic Water (AW), Pacific Water (PW), Meteoric Water (MW) and Sea Ice Meltwater (SIM). We applied SA,  $\delta^{18}\text{O}$ , and an N:P-based tracer (ANP) to calculate the fractions of each sample. The endmembers were chosen according to our dataset and previous literature: for salinity, we used both extreme values (for AW and PW) and values from the literature for MW and SIM (Whitmore et al., 2020; Newton et al., 2013; Ekwuruz et al., 2001); for ANP we followed Newton et al., (2013); finally, for  $\delta^{18}\text{O}$  we used the extreme values for AW and PW, MW = -20 (Whitmore et al., 2020), and SIM = surface values per CTD + 2.6 ‰ (as in Newton et al., 2013).

$$f_{\text{AW}} + f_{\text{PW}} + f_{\text{MW}} + f_{\text{SIM}} = 1$$

$$f_{\text{AW}}(\text{SA}) + f_{\text{PW}}(\text{SA}) + f_{\text{MW}}(\text{SA}) + f_{\text{SIM}}(\text{SA}) = \text{SA}_{\text{obs}}$$

$$f_{\text{AW}}(\text{ANP}) + f_{\text{PW}}(\text{ANP}) + f_{\text{MW}}(\text{ANP}) + f_{\text{SIM}}(\text{ANP}) = \text{ANP}_{\text{obs}}$$

$$f_{\text{AW}}(\delta^{18}\text{O}) + f_{\text{PW}}(\delta^{18}\text{O}) + f_{\text{MW}}(\delta^{18}\text{O}) + f_{\text{SIM}}(\delta^{18}\text{O}) = \delta^{18}\text{O}_{\text{obs}}$$

A more detailed description of the method can be found in D’Angelo et al., 2022 *preprint* (https://doi.org/10.5194/essd-2022-306).

## 3. Results

### 3.1 Nutrients

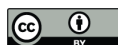

408 Phosphate, silicate and nitrate + nitrite concentrations were measured within the water column for each site.  
 409 In Fig. 3, the complete vertical profiles are displayed for each nutrient, along the longitudinal transect. The  
 410 spatial scale highlighted the Pacific-origin waters containing elevated nutrients (blueish).  
 411

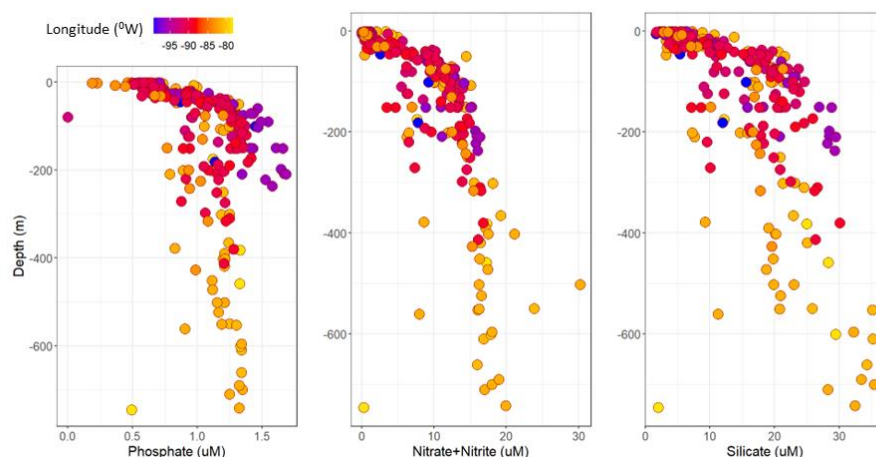

412  
 413 **Figure 3:** Phosphate, nitrate + nitrite, silicate concentrations ( $\mu\text{M}$ ) along the CAA water column. The  
 414 vertical profiles are colored by longitude of the data sites, with the most negative longitudes reflecting the  
 415 western-most stations of the NWP expedition, furthest from Baffin Bay and the North Atlantic.  
 416  
 417 The concentrations range from 0 to 1.7  $\mu\text{M}$  for phosphate, 1.7 to 35.4  $\mu\text{M}$  for silicate and 0 to 30  $\mu\text{M}$  for  
 418 nitrate + nitrite. Overall, nitrate+nitrite and silicate concentrations exhibit a monotonic increase with water  
 419 depth with the exception of phosphate that had concentration maxima around 200m depth in PWs of the  
 420 westernmost stations ( $\sim 95^\circ\text{W}$ , purplish in the color scale of Fig. 3). Nitrate+nitrite and silicate exhibited  
 421 highest concentrations within deeper AW layers, especially toward the east ( $\sim 80\text{--}85^\circ\text{W}$ , yellowish in the  
 422 color scale of Fig. 3).  
 423

### 424 3.2 Dissolved methane and isotope ratio profiles within the water column.

425 The seawater equilibrium supersaturation of methane in the CAA, relative to the atmospheric methane  
 426 concentrations  $3.42 \pm 0.05$  nM, varied across space and time due to variability in temperature and salinity.  
 427 The surface waters (surface to  $\sim 40$  m) of the CAA mostly exceeded equilibrium saturation of  $\text{CH}_4$ , up to a  
 428 maximum of 362%, while in the deeper layers methane saturation anomaly was  $< \sim 100\%$  (Fig. 4). According  
 429 to the color scale in Figure 4, the methane enrichment and depletion across a longitudinal scale did not  
 430 show a clear trend.  
 431

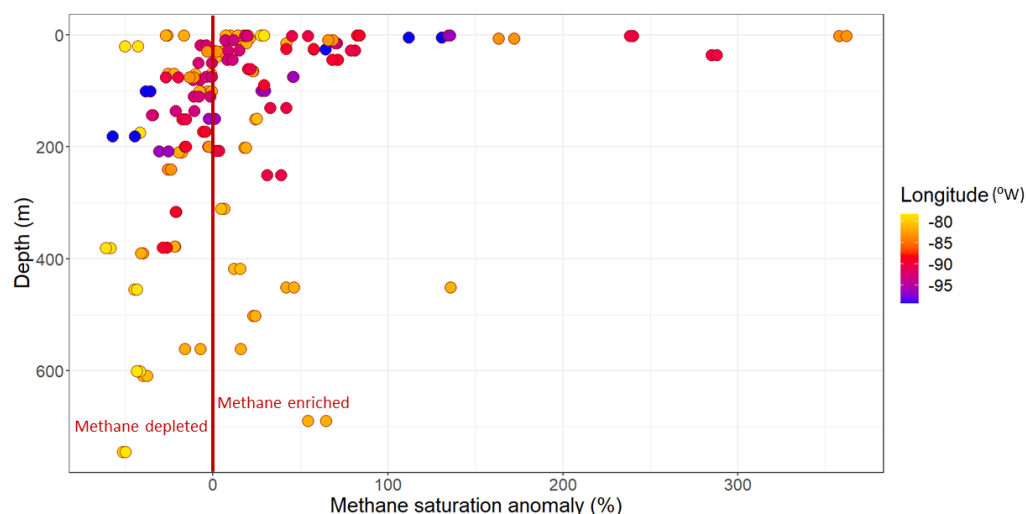

432  
 433 **Figure 4:** Methane saturation anomaly vertical profile, colored by longitude. The saturation anomaly was  
 434 calculated as  $([\text{CH}_4]_{\text{in-situ}} / [\text{CH}_4]_{\text{equilibrium}} - 1) * 100$ , considering the solubility of the atmospheric methane  
 435 at in-situ marine T and S. The dark red line indicated the methane concentrations at the equilibrium with  
 436 the atmospheric methane concentration.

437  
 438 The weak negative correlation between  $\text{CH}_4$  and salinity (Fig. S1) suggests that freshwater is associated  
 439 with higher  $[\text{CH}_4]$ , but this may be a result of both salinity and  $\text{CH}_4$  negatively covarying with depth. Figures  
 440 5 a and b show the discrete methane profiles of isotope ratio (a) and concentration coupled with the methane  
 441 concentration at the atmospheric equilibrium (b) in Croker Bay. Croker Bay represented the site with the  
 442 highest supply of meltwater (mainly meteoric origin, MW) and recorded the highest methane concentration  
 443 (Fig. 5b, ~17nM) coupled to the lowest isotopic signature (Fig. 5a, ~-64.3 ‰). The very depleted isotopic  
 444 signature could be a result of subglacial methanogenesis (Pain et al., 2020). In Croker Bay, the subsurface  
 445  $[\text{CH}_4]$  was close to atmospheric equilibrium, while concentrations were higher in the upper 25 m (Fig. 5b).  
 446



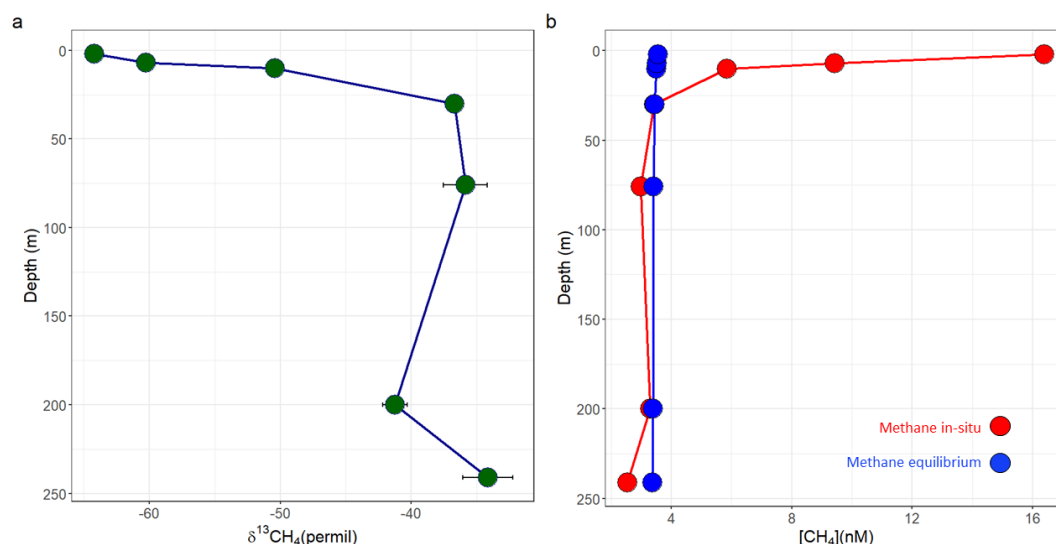

Figure 5: Methane data from samples collected in Croker Bay. a) methane isotope ratio profile; b) dissolved methane profile along the column water (methane in-situ) and methane concentration at the equilibrium relative to the atmosphere capacity (methane equilibrium).

Overall, the range of methane concentrations values varied between 2 and 17 nM across the entire dataset, whereas the isotope ratio varied between -64.2 and -17 ‰, with lowest isotope ratios in the surface ocean. The average of the  $[\text{CH}_4]$  was  $4.17 \pm 2.5$  nM, and the values below the average were recorded within deeper layers (av. depth = 190m). West of Navy Board Inlet was the only site showing deep water methane enrichment, with ~3 nM higher concentrations in deeper layers. At this site, we recorded high turbidity within deep layers, possibly suggesting methane released from sediments (Damm et al., 2005; Graves et al., 2015; Silyakova et al., 2020). Overall, the entire data set, there is an inverse correlation ( $R^2$ : 0.35, slope = -0.18) (Figure 6) between methane concentration and isotope ratio, which is consistent with methane-associated microbial metabolism acting as the primary mechanism driving the oceanic methane budget (Hanson and Hanson, 1996), where the oxidation of methane results in a decrease of the  $[\text{CH}_4]$  and an enrichment of the heavier isotope ( $\delta^{13}\text{CH}_4$ ). At the low range of concentrations, the variability in  $\delta^{13}\text{CH}_4$  becomes quite large, suggesting the potential for a variety of inputs or sources to surface values that are near the limit of equilibrium with the atmosphere. The highest methane concentrations with lighter (more negative) isotopic signature were recorded within fresher waters, as shown by the color scale in Fig. 6.

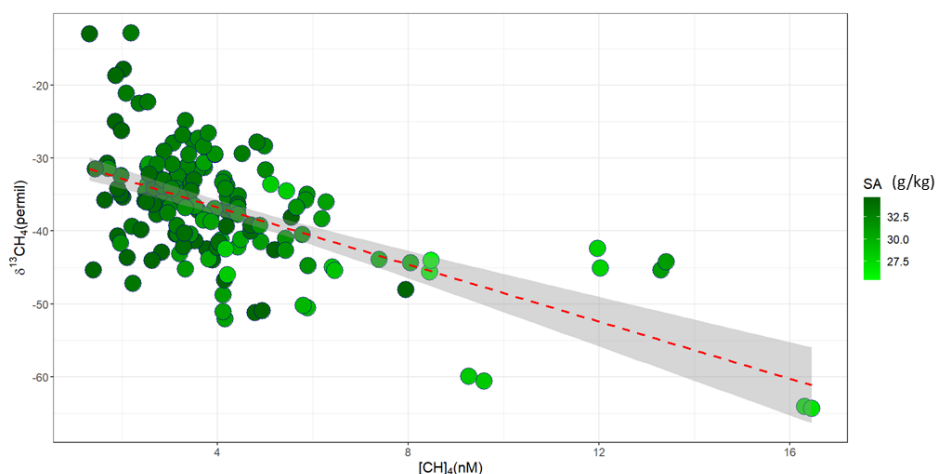

Figure 6: Relationship between the in-situ methane concentrations and the  $\delta^{13}\text{C}$  isotopic ratio. The red dashed line represents the linear regression ( $R^2$ : 0.35). The color scale for the symbols show absolute salinity (SA in g/kg). A shift to higher  $\delta^{13}\text{CH}_4$  coupled to a decrease in  $[\text{CH}_4]$  indicates potential microbial oxidation.

### 3.3 Experimental methane oxidation and production

The microbial oxidation rates ( $r_{\text{ox}}$ ) with rate constants ( $k_{\text{ox}}$ ) were calculated as in Uhlig and Loose (2017), and the values are showed in Table 2.

Table 2: Methane oxidation rate constant ( $k_{\text{ox,av}}$  ( $\text{d}^{-1}$ )) averaged between the  $k_{\text{ox, mass, balance}}$  and  $k_{\text{ox, isotope, ratio}}$ , and the microbial methane oxidation rates ( $r_{\text{ox}}$  ( $\text{nM/d}$ )). In the table we also show the sample ID, the location (Transect) and the depth of the sample collected; moreover, we show the standard deviation between the averaged  $k_{\text{ox}}$  ( $k_{\text{ox,SD}}$ ). Make the labels in the text consistent with the table.

| Sample.ID | Transect | Depth | $k_{\text{ox,av}}$ ( $\text{d}^{-1}$ ) | $k_{\text{ox,SD}}$ | $r_{\text{ox}}$ ( $\text{nM/d}$ ) |
|-----------|----------|-------|----------------------------------------|--------------------|-----------------------------------|
| 22        | JS       | 609   | 0.005                                  | 0.005              | 0.997                             |
| 26        | JS       | 7     | 0.003                                  | 0.001              | 0.458                             |
| 36        | WNBI     | 70    | 0.007                                  | 0.005              | 4.040                             |
| 37        | WNBI     | 15    | 0.005                                  | 0.002              | 2.210                             |
| 39        | WNBI     | 15    | 0.006                                  | 0.000              | 1.890                             |
| 40        | WNBI     | 450   | 0.006                                  | 0.001              | 2.700                             |
| 41        | WNBI     | 70    | 0.004                                  | 0.002              | 1.030                             |
| 43        | WNBI     | 743   | 0.003                                  | 0.002              | 1.530                             |
| 45        | WNBI     | 401   | 0.000                                  | 0.000              | 0.000                             |
| 58        | WC       | 10    | 0.010                                  | 0.000              | 3.530                             |
| 59        | WC       | 10    | 0.008                                  | 0.004              | 1.690                             |
| 76        | PRS      | 25    | 0.000                                  | 0.000              | 0.000                             |

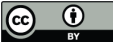

|    |     |     |       |       |       |
|----|-----|-----|-------|-------|-------|
| 78 | PRS | 25  | 0.000 | 0.000 | 0.000 |
| 79 | CB  | 7   | 0.010 | 0.001 | 3.830 |
| 81 | CB  | 241 | 0.009 | 0.007 | 1.090 |
| 82 | CB  | 241 | 0.007 | 0.008 | 0.436 |
| 83 | CB  | 7   | 0.008 | 0.008 | 0.605 |

482

483 Figure 7 shows the vertical distribution of the averaged methane oxidation rate constants ( $k_{\text{ox.mass.balance}}$  and  
484  $k_{\text{ox.isotope.ratio}}$ ). The vertical trend of the methane oxidation rates showed widespread oxidation potential for  
485 methane, with higher values within the shallower waters ( $k_{\text{ox.av}} = 0.01 \text{ d}^{-1}$  in WC and CB ~10m depth),  
486 followed by  $k_{\text{ox.av}} = 0.009 \text{ d}^{-1}$  at 241 m depth in Croker. Both the oxidation rate constants ( $k_{\text{ox.mass.balance}}$  and  
487  $k_{\text{ox.isotope.ratio}}$ ) fell in the range of values between 0 and  $0.01 \text{ d}^{-1}$ . Positive values of  $k_{\text{ox.mass.balance}}$  and  $k_{\text{ox.isotope.ratio}}$   
488 indicated a decrease in methane concentrations and an enrichment of  $^{13}\text{C}$ ; conversely, negative values  
489 indicated methane production.

490

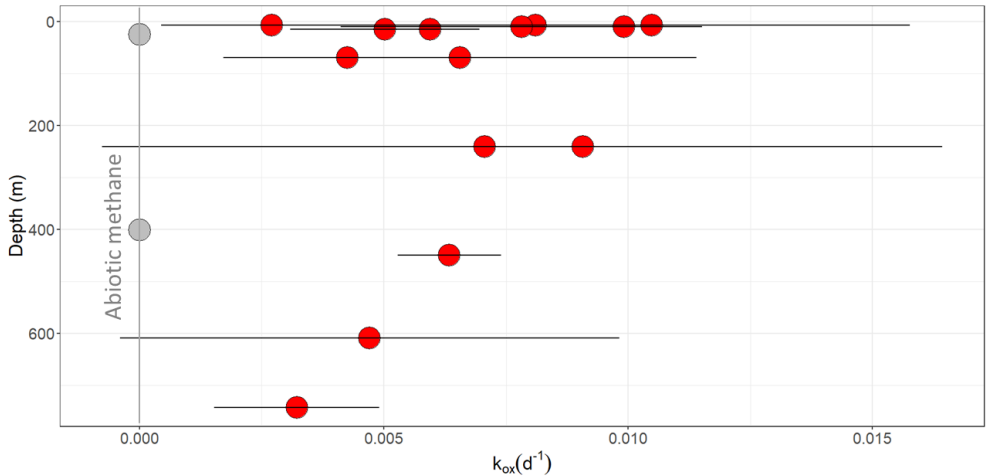

491

492 Figure 7: Vertical profiles of averaged methane oxidation rates constants for mass balance and isotope ratio.  
493 The grey dot indicates the samples showing abiotic methane, while the line at 0 determined the area with  
494 no microbial methane metabolism. The data  $> 0 \text{ (d}^{-1}\text{)}$  suggested methane oxidation potential.

495

496 In summary, the waters of the CAA exhibited a net oxidative environment, in the summer of 2019. The  
497 oxidation detection limit was passed between 5 and 18 incubation days after incubation began, revealing  
498 the range of rates we observed. The samples with incubation time less than 6 days showed potential change,  
499 however, the tight range of time did not allow us to determine a factor for the detection limit.

500

### 501 3.4 Microbial community composition

502 The 16S rRNA gene analyses on the in-situ water column community revealed phylogenetic diversity. The  
503 microbial community structure of the water column was predominantly photoautotrophic, but with a high  
504 abundance of Flavobacteriaceae, *Polaribacter* sp. (Gonzalez et al., 2008) which can be heterotrophic,  
505 psychrophilic, and mesophilic. After the incubation period, the majority of the 16S rRNA gene sequences



clustered into OTUs which were taxonomically affiliated with Alphaproteobacteria, Gammaproteobacteria and again Flavobacteriaceae (Bacteroidetes). The dominant taxa occurring in the samples showing methane oxidation were *Oleispira* ( $\gamma$ -proteobacteria), *Planctomarina* ( $\alpha$ -proteobacteria), and *Aurantivirga* (flavobacteria, Song et al., 2015). Alphaproteobacteria and Gammaproteobacteria include known MOB, however, *Oleispira* and *Planctomarina* are not yet classified as such. Nevertheless, these taxa were found in Arctic methane incubations by Uhlig et al. (2018), and Gründger et al. (2021), and are therefore likely associated with methane oxidation. The Flavobacteria are known to be secondary consumers of methane, oil, or cellular decay products (Redmond & Valentine, 2012). In particular, *Flavobacterium Polaribacter* sp. is RuBisCO-lacking and the study from Alonso-Sáez et al. (2010) showed that heterotrophic CO<sub>2</sub> assimilation was active within the nutrient-depleted stationary phase conditions in Arctic Sea waters (DeLorenzo et al., 2012). Usually, methane oxidizers have limited ability to consume multi-carbon substrates (Hanson & Hanson, 1996), and many oil degraders have no ability to consume methane (Rojo, 2009). Flavobacteria were often associated with the degradation of high molecular weight dissolved organic carbon compounds (Cottrell and Kirchman, 2000), which may be coincidentally associated with methane production (see methane paradox described above, section 1). In almost all the incubations there was occurrence of Chloroplast genome. Summarizing, our dataset emphasized the occurrence of Chloroplast genome, *Oleispira*, *Planctomarina*, and *Aurantivirga* in the methane oxidations (similar outcome of Uhlig et al., 2018 and Gründger et al., 2021). However, little is still known about this relationship, stimulating open questions on the drivers of methane oxidation activity in the Arctic Ocean.

### 3.5 Dissolved methane and isotope ratio in sea ice cores

Methane dissolved in sea ice stayed in the range of 3.3 and 24 nM, showing concentrations a bit higher than in seawater ([CH<sub>4</sub>] max in CB = 17nM). The methane maxima were recorded within Westernmost Station sea ice core (24nM), however, all the samples exhibited methane oversaturation with respect to the atmospheric concentration (av. 4.7±0.01 nM) along their profiles. Core 1 at the surface and Core 2 at the bottom (Fig. 8) showed a weak deficit of methane (3.3 and 4.5 nM, respectively), whereas all other data recorded methane supersaturation with respect of atmospheric capacity. ~~The calculation of the concentration of methane sea water at equilibrium with the normal atmosphere was derived by the Bunsen solubility coefficients, using in-situ potential temperature and a constant value of 2 for practical salinity.~~ Core 1 and Core 2 were characterized by thicker multi-year ice (Canadian Ice Service), Core 2 was sampled in the proximity of the Westernmost station. Cores 3, 4, and 5 were collected respectively in Peel Sound, close to Cunningham River, and in Prince Regent Sound (see Fig.1), and they were characterized by first-year ice. ~~In this study, we did not analyze the characteristics of the sea ice (e.g., permeability), which could be used as an indicator of the methane distribution (Verdugo et al., 2021), however, according to its physical and chemical parameters, we were able to identify the role the sea ice played on the methane cycle.~~ Core 2 was oversaturated for methane up to 95cm (av. 6.86 ± 1.76 nM), below which showed undersaturation with respect to the methane atmospheric concentration (Fig. 8). The seawater [CH<sub>4</sub>] profile showed similar values and similar trend, with oversaturation within the top layers and undersaturation below 75m depth. In Peel Sound the sea ice was characterized by nilas and thin first-year ice and surface water showed similar [CH<sub>4</sub>] and  $\delta^{13}\text{CH}_4$  (11 and 9 nM respectively in sea ice and seawater, and -50 ‰ in both). In Prince Regent Sound the sea ice was constituted by nilas and thick first-year ice (> 120 cm), and [CH<sub>4</sub>] assessed the same value in both surface water and sea ice (~7nM), while the isotope ratio measured slightly higher values in the sea ice (~-50 ‰ in surface water and ~-42‰ in sea ice).

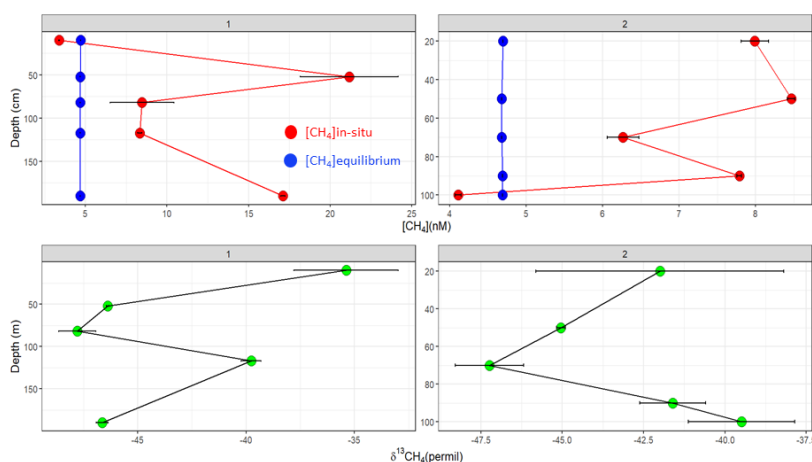

550

551 Figure 8: Methane concentrations and isotope ratios along the vertical profiles within sea ice. The red dots  
 552 indicated the in-situ methane concentrations along the sea ice core, with the methane concentrations at the  
 553 equilibrium relative to the atmosphere capacity (blue dots). The green dots showed the isotope ratio  
 554 ( $\delta^{13}CH_4$ ) of cores 1 and 2. The headers displayed the core numbers.

555

556 Summarizing, the  $\delta^{13}C$  isotopic signature in ice cores was between -52 and -33 ‰, showing shorter  
 557 variability in comparison to the in-situ water samples data.

558

#### 559 4. Discussion

560 In the Canadian Arctic Archipelago waters, the dissolved methane showed a vertical stratification with  
 561 methane excess mostly recorded in shallow waters. Here, we also recorded higher methane microbial  
 562 oxidation rates, likely associated with Pacific-origin microbes and with the seasonal biology. Observing  
 563 these results in a hydrographic context, will elucidate about the major drivers of the methane metabolism  
 564 in this specific region of the Arctic, during the summer.

565

##### 566 4.1 The methane oxidation rates across the CAA.

567 The average value of the oxidation rate constant from this study was  $0.005 \pm 0.003 \text{ d}^{-1}$ . Overall, the range of  
 568 values of  $k_{ox}$  and  $r_{ox}$  (describing the activity of methane-oxidizing microorganisms, Tab. 2) mainly stayed  
 569 within the range of values from previous Arctic research (Mau et al., 2017; Uhlig and Loose, 2017).  
 570 Moreover, the values of  $r_{ox}$  showed good fit with global methane data within a broader context (Fig. S2).  
 571 The only methane oxidations data available from the CAA waters dated back to 2005 (Kitidis et al., 2010)  
 572 and showed significantly higher  $k_{ox}$  values than any other measurements in the Arctic, including near seeps,  
 573  $k_{ox}$  averaged in Kitidis et al. (2010) is  $0.912 \text{ d}^{-1}$ . We note that the two oxidation rate measurements of Kitidis  
 574 et al., were made using methane mass balance alone, which can be subject to high oxidation rate aberrations  
 575 if methane gas leaks from the incubation chamber.

576 Previous studies from the Arctic and cold seeps from continental slopes across the globe (Mau et al. 2013;  
 577 Boetius & Wenzhöfer, 2013) reported elevated methane oxidation activity in marine environments,  
 578 coincident with high  $CH_4$  concentrations, suggesting that MOB may be able to rapidly increase oxidation  
 579 rates in response to the food source abundance. However recent studies developed in proximity of methane





580 sources, such as the Arctic shelf gas seeps (Steinle et al. 2015, 2017; Gründger et al., 2021) showed that  
 581 methane oxidation rates are sometimes mitigated by the seasonal variations of the hydrographical regimes,  
 582 which trigger a system-wide switch of the efficiency of water column methane oxidizers. In our study, we  
 583 detected higher microbial methane oxidation rates within the upper 200 m depth (see Fig.7), mainly  
 584 distributed in shallow waters, with high methane concentrations (Fig. 9). The data measured in CB heavily  
 585 influences the regression line trend in Figure 10 ( $R^2$ : 0.03, p-value: 0.34), as it recorded the highest value  
 586 of dissolved  $[CH_4]$  coupled with high methane oxidation rates. Our results overall corroborated the thesis  
 587 that methane oxidation is related to methane concentrations. We acknowledge the low amount of data  
 588 available for coupled in-situ and experimental samples; however, the spatial coverage of these data is  
 589 presently the best-available record of methane metabolism in the CAA waters.  
 590

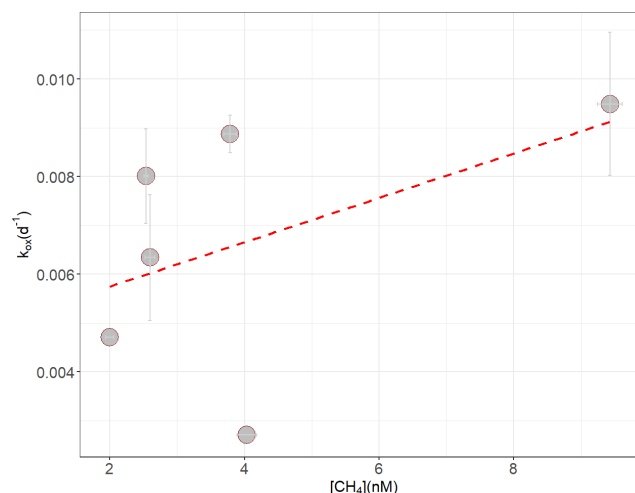

591  
 592 Figure 9: Methane dissolved in the water column against the averaged methane oxidation rate constants  
 593 ( $k_{ox}$ ). The red dashed line indicated the linear regression between the data  $R^2$ : 0.03, p-value: 0.34). The  
 594 labels over the dots indicate the stations (Croker Bay, Wellington Channel, West Navy Board Inlet, Jones  
 595 Sound).  
 596

597 To have a wider overview of the relationship between methane concentrations and oxidations, in Figure 10  
 598 we have aggregated in-situ methane and methane oxidation rate constants from several studies in both  
 599 enriched and depleted methane environments (including this one). We have plotted the study-average of  
 600 dissolved methane (in  $\log_{10}$  scale) and its oxidation rate constant. These include data from the Gulf of  
 601 Mexico (GoM), collected directly after the DWH oil spill in 2010 (Kessler et al., 2011; Rogener et al.,  
 602 2018). As expected, dissolved methane in Gulf of Mexico waters was higher than Arctic waters, however,  
 603 the methane oxidation rate constant was only slightly higher than the Arctic data. The methane oxidation  
 604 rate constants do not appear to scale proportionately with the dissolved concentrations. Instead, the plot  
 605 displayed relatively high  $[CH_4]$  associated to low  $k_{ox}$  and vice versa. This was also confirmed by the  
 606 Michaelis-Menten kinetics (Button, 2010; Michaelis–Menten, 1913) (Fig. 10 right box). The result  
 607 highlights that the kinetics increased hyperbolically with substrate concentration but leveled off once the



metabolic pathway was saturated with substrate, the maximum rate achieved by the system was recorded on a value of  $\sim 20$  nM  $[\text{CH}_4]$ . The Michaelis-Menten curve was generated excluding the GoM and Kitidis data, because the high values did not allow the convergence. Overall, our values of  $k_{\text{ox}}$  were in the low range of Arctic literature values, with an average of  $0.006 \pm 0.002 \text{ d}^{-1}$  (Fig. 10) and showed a great difference in magnitude with the only comparison in the same study area (Kitidis et al., 2010 with averaged  $k_{\text{ox}}$  of  $0.9 \text{ d}^{-1}$ ). Conversely, the dissolved methane concentrations showed close values to Kitidis et al. (2010). The differences in the oxidation rate constant may be due to, a) the nature of the samples (melt-pond and under-ice waters, while we analyzed the entire water column), b) the number of the samples incubated for methane oxidation rates (2 in total, while we had 60 incubations), c) the method used to assess the microbial methane oxidation rate (using exclusively the mass balance, while we also analyzed the isotopic ratio and verified the bags against leaks), d) the changes to the CAA that have taken place between the expeditions (2005 vs 2019). Kitidis  $k_{\text{ox}}$  value was even higher than the values measured in the Gulf of Mexico waters after the Deepwater Horizon (DWH) oil spill in April 2010 (Kessler et al., 2011; Rogener et al., 2018) (see Fig. 10).

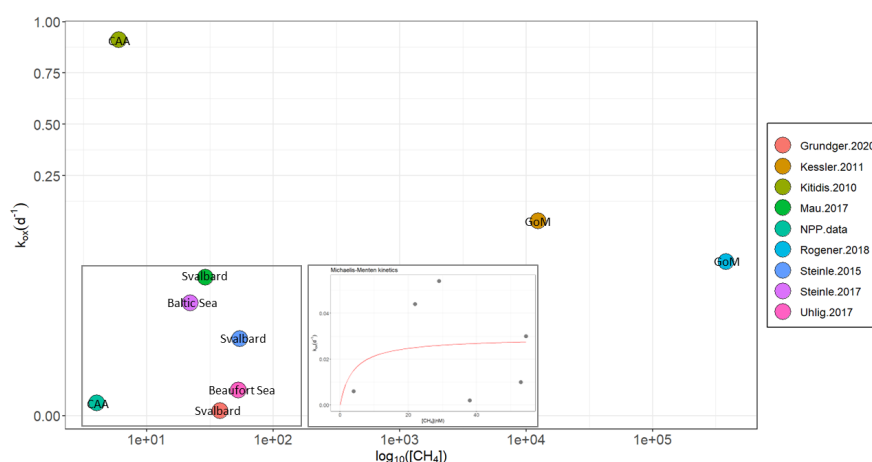

Figure 10: Averaged methane concentrations (in  $\log_{10}$  scale) and oxidation rate constant from literature. In the figure, we show methane data (both in-situ and oxidation rate constant) from six studies conducted in the Arctic waters, one in the Baltic Sea, and two in the Gulf of Mexico (GoM) waters, after the Deepwater Horizon oil spill in 2010. The labels on the dots indicate the study areas. Kessler et al. (2011) show the values of  $k_{\text{ox}}$  recorded right after the Deepwater Horizon oil spill in 2010 (Apr–Sept), while the data showed by Rogener et al. (2018) account for  $k_{\text{ox}}$  values measured from May 2010 to June 2015. Steinle et al. (2015) show methane data from a cold-seep system influenced by gas hydrates along the Svalbard continental margin, in August 2011 and 2012; whereas Steinle et al. (2017) investigated the methane concentrations and oxidations in seasonally hypoxic environments (Eckernförde Bay in the SW Baltic Sea), between October 2012 and September 2014. Grundger et al. (2020) measured dissolved methane and its oxidation rate constants at the shallow shelf of Prins Karls Forlan (Arctic shelf) in the Spring and Summer between 2015 and 2017. Mau et al. (2013) show methane data from a seepage area of Svalbard, extending from  $74^{\circ}$  to  $79^{\circ}\text{N}$ . Uhlig et al (2018) show methane data from the Beaufort Sea; and finally, Kitidis et al (2010) and the NPP data are data measured from the CAA waters. Mau et al. (2017), Steinle et al. (2017), Grundger et al. (2020), Rogener et al. (2018), and Kessler et al. (2011) measured methane oxidation rates derived from



tracer incubations using  $^3\text{H}\text{-CH}_4$ . Our study and Uhlig et al. (2018) used stable isotopes instead and measured both methane concentrations and isotope ratio. The x and y axis are expressed in  $\log_{10}$  scale, in order to scale the different values. The grey boxes highlight the data following the Michaelis-Menten kinetics (plot window on the right).

#### 4.2 Methane oxidation rates in oversaturated waters.

The methane oversaturation in seawater, with respect to the atmospheric concentrations, recorded the highest magnitudes in shallow Crocker Bay (17.7 nM), Barrow East (14.4 nM), and Peel Sound (9.13 nM) waters, two of the three stations were located in the western part of the transect (with longitudes  $> 90^\circ\text{W}$ ). Crocker Bay, despite being located at  $83^\circ\text{W}$ , was non-representative of the eastern Channel, because of its influence from the Devon Ice Cap drainage (D'Angelo et al., 2022). Barrow East and Peel Sound waters were characterized respectively by high watershed supply provided by Cunningham and Garnier Rivers (corroborated by McLaughlin et al., 2014), and by the watershed drainage of the marine-terminating rivers from the southern CAA (Brown et al., 2020). All three sites were characterized by high meltwater input (with MW and SIM  $> 10\%$ ) and detrital organic matter supply, supporting high rates of biological productivity (chlorophyll- $\alpha$  fluorescence and nutrients data: <https://doi.org/10.18739/A2BN9X45M>). Methanogenesis in the terrestrial fluvial systems and beneath terrestrial glaciers could explain the high marine  $\text{CH}_4$  concentrations observed at these sites (Bange et al., 2010; Valentine, 2011). The isotopic signature of methane in shallow Crocker Bay waters reached values  $< -64\text{‰}$  (very depleted in  $\delta^{13}\text{C}$ ), suggesting subglacial methanogenesis (Pain et al., 2020) from the Devon Ice Cap runoff. We did not have incubation results from Barrow East and Peel Sound; however, we recorded methane oxidation potential in Crocker Bay. In this site, the incubation results showed microbial methane oxidation potential in both surface and deeper layers (av.  $k_{\text{ox}}$  at surface =  $0.009 \pm 0.002\text{ d}^{-1}$ , av.  $k_{\text{ox}}$  at 241m depth =  $0.008 \pm 0.001\text{ d}^{-1}$ , see Fig.10), suggesting that the methane dissolved in the water column could be oxidized before reaching the atmosphere.

#### 4.3 Hydrography influencing the methane budget

To have additional insights into the role of the meltwater influencing the biogeochemistry in waters proximate to meltwater runoff, we observed the linearity between the methane data (both in-situ and ex-situ) and the freshwaters (Fig. 11). Overall, methane oxidation rates showed direct correlation with freshwater masses, suggesting the influence of the CAA meltwater runoff on the methane metabolism. This correlation does not include data CB, due to an artifact of the  $\delta^{18}\text{O}$  interpolation in the MP, see D'Angelo et al. (2022) (<https://doi.org/10.5194/essd-2022-306>), where we recorded the highest freshwater signal for oxygen isotopes, triggered by the glacial runoff of Devon Ice Cap; hence, slightly stronger correlations between the methane data and the MW are expected. This outcome is somewhat at odds with a previous study conducted in the CAA (i.e., Manning et al., 2022), which showed that rivers (included in what we define meteoric waters) were not a significant source of  $\text{CH}_4$  to the Arctic Ocean from early July to mid-October in years 2015-2018. Here, we did not measure the  $\text{CH}_4$  concentration within the riverine systems, so we cannot compute the flux. Nevertheless, we observe a consistent positive correlation between marine  $[\text{CH}_4]$  and freshwater distribution. This discrepancy motivates future field campaigns in the Canadian Arctic Archipelago, with high spatial and temporal resolution mapping immediately before, during and after ice melt.

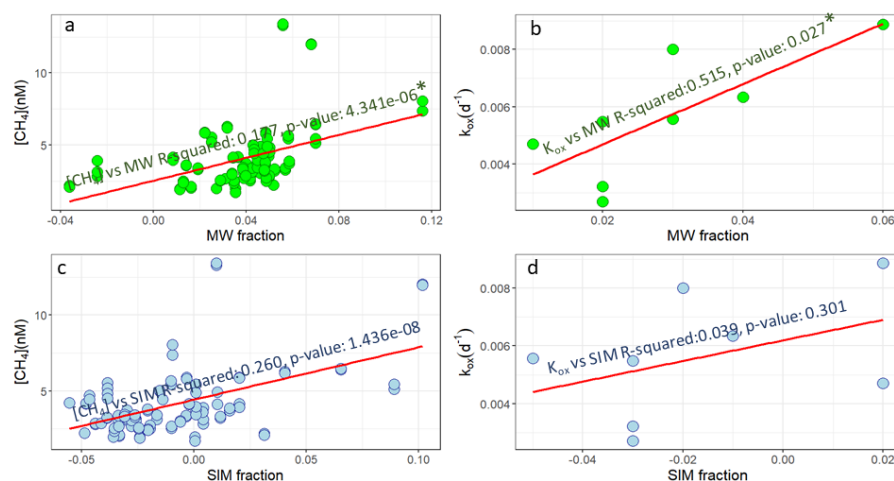

681

682 Figure 11: In-situ methane concentrations, and averaged methane oxidation rate constants ( $k_{ox}$ ) in  
 683 correlation with MP results. Panels (a) and (c) show methane in-situ concentrations against the meltwater  
 684 masses, sea ice, and meteoric meltwaters (SIM and MW); panels (b) and (d) display the methane oxidation  
 685 rate constant in relation to the meltwaters. \* The results of MW potentially undergo increase, as they did  
 686 not include the freshwater supply from Devon Ice Cap.

687

688 Expanding the correlations within the Pacific and Atlantic waters, dissolved methane was inversely  
 689 correlated to AW (-0.4 Spearman's rank) and positively correlated with PW (0.3 Spearman's rank) (see  
 690 Fig. S3). This resulted a bimodal distribution of methane across the study area (Fig. 12). Methane oxidation  
 691 occurred in Pacific-dominating stations, showing an inverse correlation with AW (-0.17 Spearman's rank).  
 692 In the Atlantic water regime, dissolved methane was depleted with concentrations below the equilibrium  
 693 saturation range, and we recorded weaker methane microbial metabolism. The occurrence of no detectable  
 694 methane oxidation in the deep layers of West Navy Board Inlet and in shallow Prince Regent Sound waters  
 695 was not associated to unique thermohaline characteristics of the two sites, and unfortunately, the community  
 696 structure was not analyzed in those sites.

697

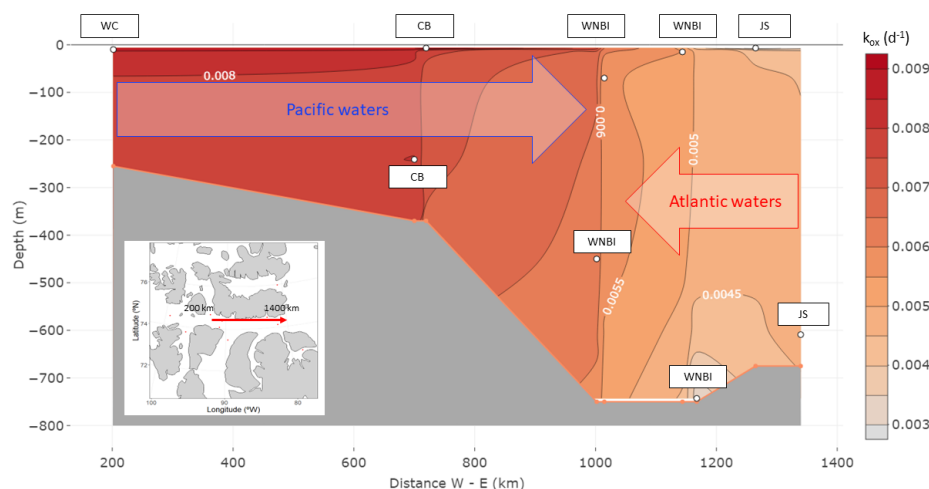

698

699 Figure 12: Section of the Parry Channel with color scale showing the  $k_{ox}$  averaged by transect and depth.  
 700 Here we show the  $k_{ox} > 0$ , excluding potential production signal in Western-most Station. The arrows  
 701 indicate the AW and PW intruding into the channel. The white dots describe the data points, while the text  
 702 boxes on top display the locations. The x axis displays the distances (in km) from the Wellington Channel  
 703 200 km (Longitude = 93.1071 °W) to the most eastern location 1400 km (Longitude = 78.2579 °W), see  
 704 details in the map in the bottom corner.

705

706 In summary, we found weak methane metabolism in AW, while it was stronger in meltwaters and PW, with  
 707 higher microbial oxidation rates and weak signal of methane potential production. These results tend to  
 708 support the role of surface processes in the CAA, including meltwater and biological production as  
 709 significantly associated with excess methane and higher methane oxidation, above all in the melt season  
 710 (e.g., estuarine circulation). The overall picture suggested supersaturation of in-situ methane in shallow  
 711 waters, coupled with faster oxidation rates in meltwater and Pacific regime, speculating prevention of the  
 712 methane migration into the atmosphere towards the western CAA.

713

#### 714 4.4 Sea Ice influence on the methane budget in the CAA.

715 The Western CAA contained the greatest sea ice cover, mostly as multi-year ice (MYI, see Fig. 13). Further,  
 716 the satellite-derived sea ice cover and the water mass estimates of sea ice meltwater tended to coincide with  
 717 greatest contributions in the West, with >10% occupying the water volume (D'Angelo et al., 2022,  
 718 https://doi.org/10.5194/essd-2022-306). The fluorescence data and the phytoplanktonic community data  
 719 (provided by the Menden-Deuer lab, URI-GSO), strongly indicated that on this side of the Channel there  
 720 was a time lag with the Eastern Sound, showing a delay in the phytoplankton bloom. This phenomenon  
 721 could have affected the methane distribution within the area, as spring blooms could activate methanotrophs  
 722 and methanogens metabolism. In WS, the maximum value of dissolved methane reached 8.7nM at 5m  
 723 depth, whereas the  $\delta^{13}C$  isotopic ratio showed very enriched values (reaching -13 ‰ at the subsurface  
 724 layers), suggesting a marine source of methane due to the preferred microbial use of  $^{12}C$ . The microbial  
 725 methane oxidation showed higher rates in the northern Sound, with the minima in ice-covered sites (Fig.  
 726 13). This result highlighted a methane-metabolic separation between the ice-covered and open-water





Channel. Increased ice permeability at the ice bottom triggers methane release, causing low methane concentrations at the bottom of the ice and methane enrichment in the water underneath (Verdugo et al., 2021; Damm et al., 2015). This behavior was detected in the methane profile within Core 2 (collected close to the Western-most station). Here, the sea ice enriched in methane could have released the gas and the relict detritus, favoring the conditions for microbial methane production, explaining the methane deficit in the ice bottom and the methane excess in the waters underneath. The same condition, but backwards, was recorded in Core 1, where we recorded sea ice oversaturated in methane, with the top centimeters showing methane deficit. The methane initially entrapped in the sea ice was probably released into the atmosphere when the sea ice surface became permeable (Verdugo et al., 2021). Summarizing, the sea ice influenced the methane cycle in our samples, triggering the methane metabolism towards the West. Comparing our results with the ones from previous studies in the same location (Kitidis et al., 2010), sea ice similarly influenced the methane oxidation rates (SIM and  $k_{ox}$  correlation = 0.63 Spearman's rank). Our outcome, confirmed by previous studies conducted in Utqiagvik and the Central Arctic (Loose et al., 2011; Damm et al., 2015; Damm et al., 2018), suggested that the residence time of methane gas in sea ice could allow it to accumulate during the freezing period and be released during the melt period, supporting the metabolic consumption in SIM. In conclusion, we can state that the sea ice in the CAA is defined by a bimodal distribution of marine methane. In the past, other studies showed the correlation between the sea ice and the greenhouse gases in the Arctic Ocean during the summer (Damm et al., 2018, Verdugo et al., 2021), however, no data were yet referred to our study area.

746

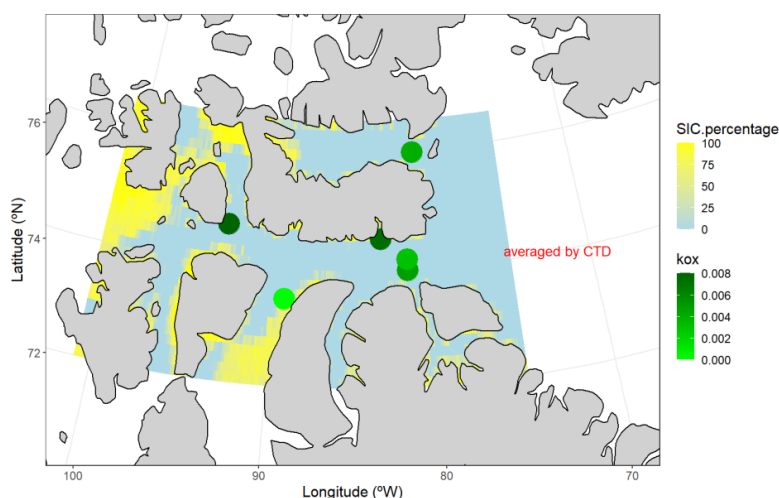

747

748 Figure 13: top view maps of the study area, with raster plots of the sea ice concentrations, and scatter plot  
 749 showing  $k_{ox}$ , averaged by CTD. The color scales show the SIC percentage and the  $k_{ox}$  values ( $d^{-1}$ ).

750

#### 751 **4.5 Marine microbial communities driving the methane cycle in the CAA.**

752 The genomic community composition results highlighted *Oleispira*, *Planctomarina* and *Aurantivirga*  
 753 occurrence in our samples in which methane oxidation was detected, suggesting these could be the methane-



oxidizing taxa responsible of the methane consumption in the CAA. Furthermore, the Chloroplast genome occurred in the methane-oxidated shallow samples. In Uhlig et al. (2018), *Oleispira* was also very abundant in the long-incubation samples compared to very low abundances in the in-situ samples, mainly dominated by  $\alpha$ - and  $\gamma$ - proteobacteria. Here, after incubating the samples with the methane standard, the communities shifted toward higher fractions of  $\gamma$ -proteobacteria over time. From our analysis, we detected the shift toward  $\alpha$ -proteobacteria instead, with *Planctomarina* dominance. The occurrence of *Oleispira* (likely belonging to *Oleispira lenta*, Wang et al., 2012) and *Aurantivirga* taxa highlighted the influence of the PW in the methane oxidation, as these taxa have been found predominantly in the North Pacific waters (Wang et al., 2012; Song et al., 2015). In particular, *Aurantivirga* occurred strictly within the bottom layer characterized by high turbidity, confirming its association with sediments. Our potential methane oxidations occurred all within waters enriched with detrital material (corroborated by the turbidity data, reaching for example 0.37 NTU in CB), supplied by the meltwater runoff. Along the water column, the Chloroplast ge. occupied the shallow layers, mainly towards the West. This confirmed the late bloom as aforementioned. This result could confirm the hypothesis of the methane production in surface waters through the P redox pathways in phosphate-starved environments (Karl et al., 2008; Repeta et al., 2016; Sosa et al., 2017 and 2020), also corroborated by the inverse correlation of -0.40 between the dissolved  $[CH_4]$  and the  $[PO_4]^{3-}$  in the Spearman's rank. Concluding, the dominant taxa associated to our oxidations are not known MOB, but they have been recently connected to the methane metabolism, posing the baseline for further investigations.

## 5. Conclusions

Collectively, the CAA waters showed methane oversaturation with respect to atmospheric saturation capacity in the upper layers. The methane oversaturation was mainly associated with the meltwaters and primary production (in nutrient depleted environments), likely following the Methylphosphonate (MPn) esters metabolization, as explained in Repeta et al. (2016) and Sousa et al. (2020). The CAA waters were characterized by methane oxidizers, with 74% showing potential methane oxidation, 5% showing potential production, and 21% resulting methane abiotic (over 17 samples). The fastest oxidation rates were recorded within meltwaters and Pacific-origin Waters, however the  $k_{ox}$  showed lower rates than the  $k_{ox}$  measured during a cruise held in 2005 in the CAA (Kitidis et al., 2010). The community structure likely responsible for the methane oxidation was characterized by three main groups nonbelonging to known MOB, but recently associated with the methane metabolism (*Aurantivirga*, *Oleispira* and *Planctomarina*); *Aurantivirga* and *Oleispira* were both isolated from PWs. This outcome suggested that the PW predominance of the CAA waters could define hotspots for methane oxidations. The ice-covered site showed the lowest methane oxidation rates, suggesting potential methane production, likely due to the late phytoplankton bloom, delayed by the sea ice coverage. This data strengthened the hypothesis that the sea ice acted as a barrier for the gas exchange, defining the underneath water's hotspot for methane excess during the summer. The Pacific regime of the CAA was characterized by methane oxidizers predominance and exhibited high potential oxidation rates.

Summarizing, the sea ice would potentially trigger methane production, the Pacific and melt waters would enhance methanotrophy, while the Atlantic Waters would be mostly methane abiotic. We could divide the entire study area into four environments, according to the methane distribution: (a) sea ice, with methane excess; (b) meltwaters (meteoric and sea ice melt), characterized by methane oxidations in oversaturated waters; (c) Pacific waters, with high methane oxidation rates, likely due to methanotrophs; (d) Atlantic regime, mostly abiotic for methane. Due to the Atlantification of the Arctic Ocean (Polyakov et al., 2017,

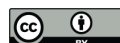

2020), we would expect higher intrusion of AW in the CAA at the expense of PW, with consequent sea ice melting. According to our outcome, the takeaway is that in such a scenario, we would expect stronger stratification, with methane excess alternated to microbial oxidations at the top 200m, overlaying methane-depleted waters, with reduced methane oxidation rates.

### **Data availability**

The produced database of this study has been archived in Arctic Data Center and can be assessed using the following link: <https://doi.org/10.18739/A2BN9X45M>.

### **Author contribution**

B.L. designed the research. B.L. and A.D. implemented the study. A.D., C.G-E., Z.K., J.S., F.C., N.V., H.R., T.E., S.U., B.L., were involved in the sampling activities. A.D., B.L., N.V., H.R., T.E., S.U., performed the analysis. A.D., B.L., A.L.K., M.G-M., F.C., C.G-E. processed the data. A.D. and B.L. wrote the manuscript, with input from all authors. The authors declare that they have no conflict of interest.

### **Competing interests**

The authors declare that they have no conflict of interest.

### **Acknowledgements**

We would extend our gratitude to the entire crew of the RVIB Oden, and the Swedish Polar Research Secretariat team for the logistic effort. We greatly appreciated the involvement of all the undergraduates and scientists participating in the expedition. We thank our Arctic guide Sarah Sriver for assistance. We acknowledge the local communities for their collaboration, and the Marine Science Research Facility at GSO - URI, for carrying out the nutrients analysis. We deeply thank NSF facilities at Thule airbase, Polarfield, Greenland for the help provided in Thule, Greenland. The study was supported by the National Science Foundation Awards #1748318 and # 1821900, with additional support from the Heising Simons Foundation. We gratefully acknowledge the NSF Program Officer for the Northwest Passage Project, Valentine Kass, and the lead PI of the project, Gail Scowcroft (Associate Director, Inner Space Center, University of Rhode Island).



## 827 **References**

828

829 Agnew, T. and Howell, S.: The use of operational ice charts for evaluating passive microwave ice  
 830 concentration data, *Atmosphere - Ocean*, 41, 317–331, <https://doi.org/10.3137/ao.410405>, 2003.

831 Alonso-Sáez, L., Galand, P. E., Casamayor, E. O., Pedrós-Alió, C., and Bertilsson, S.: High bicarbonate  
 832 assimilation in the dark by Arctic bacteria, *ISME Journal*, 4, 1581–1590,  
 833 <https://doi.org/10.1038/ismej.2010.69>, 2010.

834 Anthony, C. (1982) *The Biochemistry of Methylophs*. London, UK: Academic Press.

835 Bange, H. W., Freing, A., Kock, A., & Löscher, C. R. (2010). Marine pathways to nitrous oxide. In *Nitrous*  
 836 *Oxide and Climate Change* (1st ed., pp. 36–62). Routledge. <https://doi.org/10.4324/9781849775113>

837 Bhatia, M. P., Waterman, S., Burgess, D. O., Williams, P. L., Bundy, R. M., Mellett, T., Roberts, M., and  
 838 Bertrand, E. M.: Glaciers and Nutrients in the Canadian Arctic Archipelago Marine System, *Global*  
 839 *Biogeochem Cycles*, 35, <https://doi.org/10.1029/2021GB006976>, 2021.

840 Boden, Rich, et al. "Novel Methylophic Bacteria Isolated From the River Thames (London, UK)." *Environmental Microbiology*, vol. 10, no. 12, 2008, pp. 3225-36.

842 Boetius, A. and Wenzhöfer, F.: Seafloor oxygen consumption fuelled by methane from cold seeps,  
 843 <https://doi.org/10.1038/ngel1926>, September 2013.

844 Brown, K. A., Williams, W. J., Carmack, E. C., Fiske, G., François, R., McLennan, D., and Peucker-  
 845 Ehrenbrink, B.: Geochemistry of Small Canadian Arctic Rivers with Diverse Geological and Hydrological  
 846 Settings, *J Geophys Res Biogeosci*, 125, <https://doi.org/10.1029/2019JG005414>, 2020.

847 Brusseau, G. A., Tsien, H.-C., Hanson, R. S., and Wackett, L. P.: Optimization of trichloroethylene  
 848 oxidation by methanotrophs and the use of a colorimetric assay to detect soluble methane monooxygenase  
 849 activity, *Biodegradation*, Kluwer Academic Publishers, 19–29 pp., 1990.

850 Carmack, E. C., Yamamoto-Kawai, M., Haine, T. W. N., Bacon, S., Bluhm, B. A., Lique, C., Melling, H.,  
 851 Polyakov, I. v., Straneo, F., Timmermans, M. L., and Williams, W. J.: Freshwater and its role in the Arctic  
 852 Marine System: Sources, disposition, storage, export, and physical and biogeochemical consequences in  
 853 the Arctic and global oceans, <https://doi.org/10.1002/2015JG003140>, 1 March 2016.

854 Chistoserdova L. Modularity of methyloph, revisited. *Environ Microbiol.* 2011 Oct;13(10):2603-22.  
 855 doi: 10.1111/j.1462-2920.2011.02464.x. Epub 2011 Mar 28. PMID: 21443740.

856 Cottrell, M. T. and Kirchman, D. L.: Community Composition of Marine Bacterioplankton Determined by  
 857 16S rDNA Gene Clone Libraries and Fluorescence In Situ Hybridization, *APPLIED AND*  
 858 *ENVIRONMENTAL MICROBIOLOGY*, 5116–5122 pp., 2000.

859 Cowen, J. P., Wen, X., and Popp, B. N.: PII S0016-7037(02)00975-4 Methane in aging hydrothermal  
 860 plumes, 2002.

861 Crespo-Medina, M., Twing, K. I., Kubo, M. D. Y., Hoehler, T. M., Cardace, D., WCollom, T., and Schrenk,  
 862 M. O.: Insights into environmental controls on microbial communities in a continental serpentinite aquifer  
 863 using a microcosm-based approach, *Front Microbiol*, 5, <https://doi.org/10.3389/fmicb.2014.00604>, 2014.



- 864 D'Angelo, A., Garcia-Eidell, C., Knowlton, C., Gingras, A., Morin, H., Coleman, D., Kaelblein, J.,  
 865 Raziuddin, H., VanKeersbilck, N., Rivera, T. J., Kopka, K., Boleaga, Y., Estes, K., Nodal, A., Schulze, E.,  
 866 Ewa, T., Shaban, M., Umar, S., Santana, R., Strock, J., Gruebel, E., Digilio, M., Ludkin, R., Gong, D.,  
 867 Kerrigan, Z., Otokiak, M., Crable, F., Trenholm, N., Millstone, T., Montenegro, K., Kim, M., Porter, G.,  
 868 Ketter, T., Berkelhammer, M., King, A. L., Gonzalez-Meler, M. A., and Loose, B.: Water masses  
 869 distribution in the Canadian Arctic Archipelago: Implementation of the Optimal MultiParameter analysis  
 870 (OMP), Earth Syst. Sci. Data Discuss. [preprint], <https://doi.org/10.5194/essd-2022-306>, 2022.
- 871 Damm, E., Bauch, D., Krumpfen, T., Rabe, B., Korhonen, M., Vinogradova, E., and Uhlig, C.: The  
 872 Transpolar Drift conveys methane from the Siberian Shelf to the central Arctic Ocean, Sci Rep, 8,  
 873 <https://doi.org/10.1038/s41598-018-22801-z>, 2018.
- 874 Damm, E., Helmke, E., Thoms, S., Schauer, U., Nöthig, E., Bakker, K., Kiene, R. P., and Wegener, A.:  
 875 Methane production in aerobic oligotrophic surface water in the central Arctic Ocean, Biogeosciences,  
 876 1099–1108 pp., 2010.
- 877 Damm, E., Kiene, R. P., Schwarz, J., Falck, E., and Dieckmann, G.: Methane cycling in Arctic shelf water  
 878 and its relationship with phytoplankton biomass and DMSP, Mar Chem, 109, 45–59,  
 879 <https://doi.org/10.1016/j.marchem.2007.12.003>, 2008.
- 880 Damm, E., Rudels, B., Schauer, U., Mau, S., and Dieckmann, G.: Methane excess in Arctic surface water-  
 881 triggered by sea ice formation and melting, Sci Rep, 5, <https://doi.org/10.1038/srep16179>, 2015.
- 882 Dang, H. and Lovell, C. R.: Microbial Surface Colonization and Biofilm Development in Marine  
 883 Environments, Microbiology and Molecular Biology Reviews, 80, 91–138,  
 884 <https://doi.org/10.1128/mmbr.00037-15>, 2016.
- 885 DeLorenzo, S., Bräuer, S. L., Edgmont, C. A., Herfort, L., Tebo, B. M., and Zuber, P.: Ubiquitous Dissolved  
 886 Inorganic Carbon Assimilation by Marine Bacteria in the Pacific Northwest Coastal Ocean as Determined  
 887 by Stable Isotope Probing, PLoS One, 7, <https://doi.org/10.1371/journal.pone.0046695>, 2012.
- 888 DiTullio G, Lee P (2019) Dissolved nutrient concentrations, High Arctic Ocean, August-September 2018.  
 889 Arctic Data Center. <https://doi.org/10.18739/A2CN6Z03F>
- 890 Dunbar, Moira. “The Geographical Position of the North Water.” *Arctic* 22: 438-441,  
 891 DOI:[10.14430/ARCTIC3235](https://doi.org/10.14430/ARCTIC3235) Corpus ID: 129164760, 1969.
- 892 Dunfield PF, Yuryev A, Senin P, Smirnova AV, Stott MB, Hou S, Ly B, Saw JH, Zhou Z, Ren Y, Wang J,  
 893 Mountain BW, Crowe MA, Weatherby TM, Bodelier PL, Liesack W, Feng L, Wang L, Alam M. Methane  
 894 oxidation by an extremely acidophilic bacterium of the phylum Verrucomicrobia. *Nature*. 2007 Dec  
 895 6;450(7171):879-82. doi: 10.1038/nature06411. Epub 2007 Nov 14. PMID: 18004300.
- 896 Fenwick, L., Capelle, D., Damm, E., Zimmermann, S., Williams, W. J., Vagle, S., and Tortell, P. D.:  
 897 Methane and nitrous oxide distributions across the North American Arctic Ocean during summer, 2015, J  
 898 Geophys Res Oceans, 122, 390–412, <https://doi.org/10.1002/2016JC012493>, 2017.
- 899 Ferré, B., Jansson, P. G., Moser, M., Serov, P., Portnov, A., Graves, C. A., Panieri, G., Gründger, F., Berndt,  
 900 C., Lehmann, M. F., and Niemann, H.: Reduced methane seepage from Arctic sediments during cold  
 901 bottom-water conditions, Nat Geosci, 13, 144–148, <https://doi.org/10.1038/s41561-019-0515-3>, 2020.





- 902 Fisher, R. E., Sriskantharajah, S., Lowry, D., Lanoisellé, M., Fowler, C. M. R., James, R. H., Hermansen,  
 903 O., Lund Myhre, C., Stohl, A., Greinert, J., Nisbet-Jones, P. B. R., Mienert, J., and Nisbet, E. G.: Arctic  
 904 methane sources: Isotopic evidence for atmospheric inputs, *Geophys Res Lett*, 38,  
 905 <https://doi.org/10.1029/2011GL049319>, 2011.
- 906 Florez-Leiva, L., Damm, E., and Farías, L.: Methane production induced by dimethylsulfide in surface  
 907 water of an upwelling ecosystem, *Prog Oceanogr*, 112–113, 38–48,  
 908 <https://doi.org/10.1016/j.pocean.2013.03.005>, 2013.
- 909 Gonzalez, J.M., Fernandez-Gomez, B., Fernandez-Guerra, A., Gomez-Consarnau, L., Sanchez, O., Coll-  
 910 Llado, M., Del Campo, J., Escudero, L., Rodriguez-Martinez, R., Alonso-Saez, L., Latasa, M., Paulsen, I.,  
 911 Nedashkovskaya, O., Lekunberri, I., Pinhassi, J., and Pedros-Alio, C. "Genome analysis of the  
 912 proteorhodopsin-containing marine bacterium *Polaribacter* sp. MED152 (Flavobacteria)." *Proc. Natl. Acad.*  
 913 *Sci. USA* (2008) 105:8724–8729.
- 914 Grant, N. J. and Whiticar, M. J.: Stable carbon isotopic evidence for methane oxidation in plumes above  
 915 Hydrate Ridge, Cascadia Oregon Margin, *Global Biogeochem Cycles*, 16, 71–1–71–13,  
 916 <https://doi.org/10.1029/2001gb001851>, 2002.
- 917 Graves, C. A., L. Steinle, G. Rehder, H. Niemann, D. P. Connelly, D. Lowry, R. E. Fisher, A. W. Stott, H.  
 918 Sahling, and R. H. James (2015), Fluxes and fate of dissolved methane released at the seafloor at the landward  
 919 limit of the gas hydrate stability zone offshore western Svalbard, *J. Geophys. Res. Oceans*, 120, 6185–6201,  
 920 doi:10.1002/2015JC011084.
- 921 Gründger, F., Probandt, D., Knittel, K., Carrier, V., Kalenitchenko, D., Silyakova, A., Serov, P., Ferré, B.,  
 922 Svenning, M. M., and Niemann, H.: Seasonal shifts of microbial methane oxidation in Arctic shelf waters  
 923 above gas seeps, *Limnol Oceanogr*, 66, 1896–1914, <https://doi.org/10.1002/lno.11731>, 2021.
- 924 Hanson RS, Hanson TE. Methanotrophic bacteria. *Microbiol Rev.* 1996 Jun;60(2):439–71. doi:  
 925 10.1128/mr.60.2.439–471.1996. PMID: 8801441; PMCID: PMC239451.
- 926 Hoefman S. From nature to nurture: isolation, physiology and preservation of methane-oxidizing bacteria.  
 927 [Ghent, Belgium]: Ghent University. Faculty of Sciences; 2013.
- 928 Ingram, R. G. and Larouche, P.: Variability of an under-ice river plume in Hudson Bay, *J Geophys Res*  
 929 *Oceans*, 92, 9541–9547, <https://doi.org/10.1029/JC092iC09p09541>, 1987.
- 930 Jakobsson, M., R. Macnab, L. Mayer, R. Anderson, M. Edwards, J. Hatzky, H. W. Schenke, and P. Johnson.  
 931 An improved bathymetric portrayal of the Arctic Ocean: Implications for ocean modeling and geological,  
 932 geophysical and oceanographic analyses, *Geophysical Research Letters*, DOI: 10.1029/2008GL033520,  
 933 2008.
- 934 Jensen, S., Neufeld, J. D., Birkeland, N. K., Hovland, M., and Murrell, J. C.: Methane assimilation and  
 935 trophic interactions with marine Methylomicrobium in deep-water coral reef sediment off the coast of  
 936 Norway, *FEMS Microbiol Ecol*, 66, 320–330, <https://doi.org/10.1111/j.1574-6941.2008.00575.x>, 2008.
- 937 Karl, D., Beversdorf, L., Björkman, K. et al. Aerobic production of methane in the sea. *Nature Geosci* 1,  
 938 473–478 (2008). <https://doi.org/10.1038/ngeo234>



- 939 Kessler JD, Valentine DL, Redmond MC, Du M, Chan EW, Mendes SD, Quiroz EW, Villanueva CJ, Shusta  
 940 SS, Werra LM, Yvon-Lewis SA, Weber TC. A persistent oxygen anomaly reveals the fate of spilled  
 941 methane in the deep Gulf of Mexico. *Science*. 2011 Jan 21;331(6015):312-5. doi: 10.1126/science.1199697.  
 942 Epub 2011 Jan 6. PMID: 21212320.
- 943 Kitidis, V., Upstill-Goddard, R. C., and Anderson, L. G.: Methane and nitrous oxide in surface water along  
 944 the North-West Passage, Arctic Ocean, *Mar Chem*, 121, 80–86,  
 945 <https://doi.org/10.1016/j.marchem.2010.03.006>, 2010.
- 946 Kudela, R. M., Seeyave, S., and Cochlan, W. P.: The role of nutrients in regulation and promotion of  
 947 harmful algal blooms in upwelling systems, *Prog Oceanogr*, 85, 122–135,  
 948 <https://doi.org/10.1016/j.pocean.2010.02.008>, 2010.
- 949 Lenhart, K., Klintzsch, T., Langer, G., Nehrke, G., Bunge, M., Schnell, S., and Keppler, F.: Evidence for  
 950 methane production by the marine algae *Emiliania huxleyi*, *Biogeosciences*, 13, 3163–3174,  
 951 <https://doi.org/10.5194/bg-13-3163-2016>, 2016.
- 952 Loose, B., Schlosser, P., Perovich, D., Ringelberg, D., Ho, D. T., Takahashi, T., Richter-Menge, J.,  
 953 Reynolds, C. M., McGillis, W. R., and Tison, J. L.: Gas diffusion through columnar laboratory sea ice:  
 954 Implications for mixed-layer ventilation of CO<sub>2</sub> in the seasonal ice zone, *Tellus B Chem Phys Meteorol*,  
 955 63, 23–39, <https://doi.org/10.1111/j.1600-0889.2010.00506.x>, 2011.
- 956 Mahieu, K., Visscher, A. de, Vanrolleghem, P. A., and Cleemput, O. van: Carbon and hydrogen isotope  
 957 fractionation by microbial methane oxidation: Improved determination, in: *Waste Management*, 389–398,  
 958 <https://doi.org/10.1016/j.wasman.2005.11.006>, 2006.
- 959 Mau, S., Blees, J., Helmke, E., Niemann, H., and Damm, E.: Vertical distribution of methane oxidation and  
 960 methanotrophic response to elevated methane concentrations in stratified waters of the Arctic fjord  
 961 Storfjorden (Svalbard, Norway), *Biogeosciences*, 10, 6267–6268, [https://doi.org/10.5194/bg-10-6267-](https://doi.org/10.5194/bg-10-6267-2013)  
 962 2013, 2013.
- 963 McLaughlin, F., Carmack, E., Proshutinsky, A., Krishfield, R. A., Guay, C., Yamamoto-Kawai, M., Jackson,  
 964 J. M., and Williams, B.: The Rapid Response of the Canada Basin to Climate Forcing: FROM  
 965 BELLWETHER TO ALARM BELLS, *Source: Oceanography*, 24, 146–159,  
 966 <https://doi.org/10.2307/24861309>, 2007.
- 967 Oh, Y., Zhuang, Q., Liu, L., Welp, L. R., Lau, M. C. Y., Onstott, T. C., Medvigy, D., Bruhwiler, L.,  
 968 Dlugokencky, E. J., Hugelius, G., D’Imperio, L., and Elberling, B.: Reduced net methane emissions due to  
 969 microbial methane oxidation in a warmer Arctic, *Nat Clim Chang*, 10, 317–321,  
 970 <https://doi.org/10.1038/s41558-020-0734-z>, 2020.
- 971 Pachauri, R. K., Mayer, Leo., and Intergovernmental Panel on Climate Change: Climate change 2014 :  
 972 synthesis report, 151 pp., n.d.
- 973 Poehlein, A., Solano, J. D. M., Flitsch, S. K., Krabben, P., Winzer, K., Reid, S. J., Jones, D. T., Green, E.,  
 974 Minton, N. P., Daniel, R., and Dürre, P.: Microbial solvent formation revisited by comparative genome  
 975 analysis, *Biotechnol Biofuels*, 10, <https://doi.org/10.1186/s13068-017-0742-z>, 2017.



- 976 Pol A, Heijmans K, Harhangi HR, Tedesco D, Jetten MS, Op den Camp HJ. Methanotrophy below pH 1  
977 by a new *Verrucomicrobia* species. *Nature*. 2007 Dec 6;450(7171):874-8. doi: 10.1038/nature06222. Epub  
978 2007 Nov 14. PMID: 18004305.
- 979 Polyakov, I. V., Alkire, M. B., Bluhm, B. A., Brown, K. A., Carmack, E. C., Chierici,  
980 M., Danielson, S. L., Ellingsen, I., Ershova, E. A., Gårdfeldt, K., Ingvaldsen, R. B., Pnyushkov, A.  
981 V., Slagstad, D., and Wassmann, P.: Bo-realization of the Arctic Ocean in Response to  
982 Anomalous Advection From Sub-Arctic Seas, *Front. Mar. Sci.*, 7,  
983 491, <https://doi.org/10.3389/fmars.2020.00491>, 2020.
- 984 Polyakov, I. V., Pnyushkov, A. V., Alkire, M. B., Ashik, I. M., Bau-mann, T. M., Carmack, E. C.,  
985 Goszczko, I., Guthrie, J., Ivanov, V. V., Kanzow, T., Krishfield, R., Kwok, R., Sundfjord, A., Morison, J.,  
986 Rember, R., and Yulin, A.: Greater role for Atlantic inflows on sea-ice loss in the Eurasian Basin of the  
987 Arctic Ocean, *Science*, 356, 285–291, <https://doi.org/10.1126/science.aai8204>, 2017.
- 988 Prinsenbergh, S. J. and Bennet, E. B.: Transport between Peel Sound and Barrow Strait in the Canadian  
989 Arctic, *Continental Shelf Research*, 427–444 pp., 1989.
- 990 Reeburgh, W. S., Ward, B. B., Whalen, S. C., Sandbeck, K. A., Kilpatrick, K. A., and Kerkhof, L. J.: Black  
991 Sea methane geochemistry, *Deep-Sea Research, Part A*, 38, [https://doi.org/10.1016/s0198-0149\(10\)80030-](https://doi.org/10.1016/s0198-0149(10)80030-5)  
992 5, 1991.
- 993 Repeta, D. J., Ferrón, S., Sosa, O. A., Johnson, C. G., Repeta, L. D., Acker, M., Delong, E. F., and Karl, D.  
994 M.: Marine methane paradox explained by bacterial degradation of dissolved organic matter, *Nat Geosci*,  
995 9, 884–887, <https://doi.org/10.1038/ngeo2837>, 2016.
- 996 Rogener, M. K., Bracco, A., Hunter, K. S., Saxton, M. A., and Joye, S. B.: Long-term impact of the  
997 Deepwater Horizon oil well blowout on methane oxidation dynamics in the northern Gulf of Mexico,  
998 *Elementa*, 6, <https://doi.org/10.1525/elementa.332>, 2018.
- 999 Rojo, F.: Degradation of alkanes by bacteria: Minireview, [https://doi.org/10.1111/j.1462-](https://doi.org/10.1111/j.1462-2920.2009.01948.x)  
1000 2920.2009.01948.x, 2009.
- 1001 Saidi-Mehrabadi, A., He, Z., Tamas, I., Sharp, C. E., Brady, A. L., Rochman, F. F., Bodrossy, L., Abell, G.  
1002 C. J., Penner, T., Dong, X., Sensen, C. W., and Dunfield, P. F.: Methanotrophic bacteria in oil sands tailings  
1003 ponds of northern Alberta, *ISME Journal*, 7, 908–921, <https://doi.org/10.1038/ismej.2012.163>, 2013.
- 1004 Sasakawa, M., Tsunogai, U., Kameyama, S., Nakagawa, F., Nojiri, Y., and Tsuda, A.: Carbon isotopic  
1005 characterization for the origin of excess methane in subsurface seawater, *J Geophys Res Oceans*, 113,  
1006 <https://doi.org/10.1029/2007JC004217>, 2008.
- 1007 Saunio, M., R. Staver, A., Poulter, B., Bousquet, P., G. Canadell, J., B. Jackson, R., A. Raymond, P., J.  
1008 Dlugokencky, E., Houweling, S., K. Patra, P., Ciais, P., K. Arora, V., Bastviken, D., Bergamaschi, P., R.  
1009 Blake, D., Brailsford, G., Bruhwiler, L., M. Carlson, K., Carrol, M., Castaldi, S., Chandra, N., Crevoisier,  
1010 C., M. Crill, P., Covey, K., L. Curry, C., Etiope, G., Frankenberg, C., Gedney, N., I. Hegglin, M., Höglund-  
1011 Isaksson, L., Hugelius, G., Ishizawa, M., Ito, A., Janssens-Maenhout, G., M. Jensen, K., Joos, F., Kleinen,  
1012 T., B. Krummel, P., L. Langenfelds, R., G. Laruelle, G., Liu, L., MacHida, T., Maksyutov, S., C. McDonald,  
1013 K., McNorton, J., A. Miller, P., R. Melton, J., Morino, I., Müller, J., Murguía-Flores, F., Naik, V., Niwa,  
1014 Y., Noce, S., O'Doherty, S., J. Parker, R., Peng, C., Peng, S., P. Peters, G., Prigent, C., Prinn, R., Ramonet,

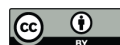

- 1015 M., Regnier, P., J. Riley, W., A. Rosentreter, J., Segers, A., J. Simpson, I., Shi, H., J. Smith, S., Paul Steele,  
1016 L., F. Thornton, B., Tian, H., Tohjima, Y., N. Tubiello, F., Tsuruta, A., Viovy, N., Voulgarakis, A., S.  
1017 Weber, T., van Weele, M., R. Van Der Werf, G., F. Weiss, R., Worthy, D., Wunch, D., Yin, Y., Yoshida,  
1018 Y., Zhang, W., Zhang, Z., Zhao, Y., Zheng, B., Zhu, Q., Zhu, Q., and Zhuang, Q.: The global methane  
1019 budget 2000-2017, *Earth Syst Sci Data*, 12, 1561–1623, <https://doi.org/10.5194/essd-12-1561-2020>, 2020.
- 1020 Silyakova, A., and others. 2020. Physical controls of dynamics of methane venting from a shallow seep  
1021 area west of Svalbard. *Cont. Shelf Res.* 194: 104030.
- 1022 Song, J., Choi, A., Im, M., Joung, Y., Yoshizawa, S., Cho, J. C., and Kogure, K.: *Aurantivirga profunda*  
1023 *gen. nov. sp. nov.* isolated from deep-seawater, a novel member of the family flavobacteriaceae, *Int J Syst*  
1024 *Evol Microbiol*, 65, 4850–4856, <https://doi.org/10.1099/ijsem.0.000662>, 2015.
- 1025 Sosa, O. A., Burrell, T. J., Wilson, S. T., Foreman, R. K., Karl, D. M., and Repeta, D. J.: Phosphonate  
1026 cycling supports methane and ethylene supersaturation in the phosphate-depleted western North Atlantic  
1027 Ocean, *Limnol Oceanogr*, 65, 2443–2459, <https://doi.org/10.1002/lno.11463>, 2020.
- 1028 Steinle, L., Graves, C., Treude, T., Ferre, B., Biastoch, A., Bussmann, I., Berndt, C., Krastel, S., James, R.  
1029 H., Behrens, E., Böning, C.W., Greinert, J., Sapart, C-J., Scheinert, M., Sommer, S., Lehmann, Moritz F.,  
1030 Niemann, H., (2015): Methane concentration, oxidation rates and abundance of bacteria during Maria S.  
1031 Merian cruise MSM21/4 at Svalbard seeps in summer 2012. *PANGAEA*,  
1032 <https://doi.org/10.1594/PANGAEA.844010>, In supplement to: Steinle, L et al. (2015): Water column  
1033 methanotrophy controlled by a rapid oceanographic switch. *Nature Geoscience*, 8(5), 378–382,  
1034 <https://doi.org/10.1038/ngeo2420>
- 1035 Stigebrandt, A., 1984.: [15200485 - *Journal of Physical Oceanography*] The North Pacific\_ A Global-Scale  
1036 Estuary, n.d.
- 1037 Sultan, N., Plaza-Faverola, A., Vadakkepuliambatta, S., Buenz, S., and Knies, J.: Impact of tides and sea-  
1038 level on deep-sea Arctic methane emissions, *Nat Commun*, 11, [https://doi.org/10.1038/s41467-020-18899-](https://doi.org/10.1038/s41467-020-18899-3)  
1039 3, 2020.
- 1040 Tomczak, M. A multi-parameter extension of temperature/salinity diagram techniques for the analysis of  
1041 non-isopycnal mixing. *Progress in Oceanography*, 10, 147-171, 1981.
- 1042 Torres-Valdés, S., Tsubouchi, T., Bacon, S., Naveira-Garabato, A. C., Sanders, R., McLaughlin, F. A.,  
1043 Petrie, B., Kattner, G., Azetsu-Scott, K., and Whitledge, T. E.: Export of nutrients from the Arctic Ocean,  
1044 *J Geophys Res Oceans*, 118, 1625–1644, <https://doi.org/10.1002/jgrc.20063>, 2013.
- 1045 Uhlig, C. and Loose, B.: Using stable isotopes and gas concentrations for independent constraints on  
1046 microbial methane oxidation at Arctic Ocean temperatures, *Limnol. Oceanogr.: Methods*, 15, 737–751,  
1047 <https://doi.org/10.1594/PANGAEA.874893>, 2017.
- 1048 Uhlig, C., Kirkpatrick, J. B., D'Hondt, S., and Loose, B.: Methane-oxidizing seawater microbial  
1049 communities from an Arctic shelf, *Biogeosciences*, 15, 3311–3329, [https://doi.org/10.5194/bg-15-3311-](https://doi.org/10.5194/bg-15-3311-2018)  
1050 2018, 2018.
- 1051 Valentine, D. L.: Biogeochemistry and microbial ecology of methane oxidation in anoxic environments: a  
1052 review, *Antonie van Leeuwenhoek*, 271–282 pp., 2002.



- 1053 Wang, Y., Yu, M., Austin, B., and Zhang, X. H.: *Oleispira lenta* sp. nov., a novel marine bacterium isolated  
1054 from Yellow sea coastal seawater in Qingdao, China, *Antonie van Leeuwenhoek, International Journal of*  
1055 *General and Molecular Microbiology*, 101, 787–794, <https://doi.org/10.1007/s10482-011-9693-8>, 2012.
- 1056 Whiticar, M. J.: Carbon and hydrogen isotope systematics of bacterial formation and oxidation of methane,  
1057 *Chemical Geology*, 291–314 pp., 1999.
- 1058
